# Supplementary material
Source: PubMed Central journal article supplement (PMC4042017)
Supplement: mmc1.pdf [file mmc1.pdf]

# THE LANCET

## Supplementary appendix

This appendix formed part of the original submission and has been peer reviewed. We post it as supplied by the authors.

Supplement to: Rapsomaniki E, Timmis A, George J, et al. Blood pressure and incidence of twelve cardiovascular diseases: lifetime risks, healthy life-years lost, and age-specific associations in 1.25 million people. *Lancet* 2014; **383**: 1899–911.

**Table S 1 Overview of codes used to define each cardiovascular endpoints and data sources. Details of how these codes are combined are given in the CALIBER data portal**

| Endpoint                                              | CPRD – Read codes                                                                                                                                                                                                                                                                                                                                                                                                                                                                                                                                          | MINAP – specific disease registry                                      | HES – OPCS 4 hospital procedures                                                                                                                            | HES – ICD 10 hospital diagnoses†                                                                                                                                                                                                                                                                                                                         | ONS – ICD 10 causes of death‡ |
|-------------------------------------------------------|------------------------------------------------------------------------------------------------------------------------------------------------------------------------------------------------------------------------------------------------------------------------------------------------------------------------------------------------------------------------------------------------------------------------------------------------------------------------------------------------------------------------------------------------------------|------------------------------------------------------------------------|-------------------------------------------------------------------------------------------------------------------------------------------------------------|----------------------------------------------------------------------------------------------------------------------------------------------------------------------------------------------------------------------------------------------------------------------------------------------------------------------------------------------------------|-------------------------------|
| <b>Stable angina</b>                                  | <p>G33.00: Stable Angina</p> <p>G33z.00: Angina pectoris NOS + 19 other Read codes for diagnosis of stable angina pectoris.</p> <p>G33z400: Ischaemic chest pain</p> <p>Coded test results associated with 33 Read codes for coronary angiography or</p> <p>139 Read codes for myocardial ischaemia tests (resting ECG, exercise ECG, stress echo, radioisotope scan)</p> <p>57 Read codes for coronary artery bypass graft</p> <p>28 Read codes for percutaneous coronary intervention</p> <p>Two or more successive prescriptions for anti-anginals.</p> | nu                                                                     | <p>K40-K46: Coronary artery bypass graft.</p> <p>K49, K50 and K75: Percutaneous coronary intervention</p>                                                   | <p>I20.1: Angina pectoris with documented spasm</p> <p>I20.8: Other forms of angina pectoris</p> <p>I20.9: Angina pectoris, unspecified</p>                                                                                                                                                                                                              | nu                            |
| <b>Unstable angina</b>                                | <p>G311500: Acute coronary syndrome</p> <p>G311100: Unstable angina + 10 other Read codes for unstable angina</p>                                                                                                                                                                                                                                                                                                                                                                                                                                          | Discharge diagnosis of acute coronary syndrome without raised troponin | Lack of coronary artery bypass graft or percutaneous coronary intervention record in the same hospital spell as I20.9 implies admission for unstable angina | <p>I20.0: Unstable angina.</p> <p>I24.0: Coronary thrombosis not resulting in MI.</p> <p>I24.8: Other forms of ischaemic heart disease.</p> <p>I24.9: Acute ischaemic heart disease, unspecified.</p> <p>‘I20.9: Angina pectoris, unspecified’ without coronary artery bypass graft or percutaneous coronary intervention in the same hospital spell</p> | nu                            |
| <b>Coronary heart disease not otherwise specified</b> | G3...00: Ischaemic heart disease + 29 other Read codes                                                                                                                                                                                                                                                                                                                                                                                                                                                                                                     | nu                                                                     | nu                                                                                                                                                          | I25 (CHD NOS, chronic ischaemic heart disease, silent MI) except ‘I25.2: Old MI’                                                                                                                                                                                                                                                                         | nu                            |

|                                                                                        |                                                                                                                                                                                                                                                                                                                                                                                                                                  |                                                                                                                |                                                                                                                                                                                       |                                                                                                                                                                                                                                                                                                 |                                                                                                                                                                                                                                                                                               |
|----------------------------------------------------------------------------------------|----------------------------------------------------------------------------------------------------------------------------------------------------------------------------------------------------------------------------------------------------------------------------------------------------------------------------------------------------------------------------------------------------------------------------------|----------------------------------------------------------------------------------------------------------------|---------------------------------------------------------------------------------------------------------------------------------------------------------------------------------------|-------------------------------------------------------------------------------------------------------------------------------------------------------------------------------------------------------------------------------------------------------------------------------------------------|-----------------------------------------------------------------------------------------------------------------------------------------------------------------------------------------------------------------------------------------------------------------------------------------------|
| <b>Non-fatal acute Myocardial Infarction (MI)</b>                                      | <p>G30X000: Acute ST segment elevation myocardial infarction.</p> <p>G307100: Acute non-ST segment elevation myocardial infarction.</p> <p>G30..15: MI Acute myocardial infarction + 53 other Read codes</p> <p>7929100: Percut transluminal coronary thrombolysis with streptokinase + 3 other Read codes for coronary thrombolysis</p> <p>Elevated cardiac markers, troponin or CKMB results associated with 16 Read codes</p> | <p>MI with or without ST elevation based on initial ECG findings, raised troponins and clinical diagnosis.</p> | <p>K50.2: Percutaneous transluminal coronary thrombolysis using streptokinase</p> <p>K50.3: Percutaneous transluminal injection of therapeutic substance into coronary artery NEC</p> | <p>I21: Acute MI.</p> <p>I22: Subsequent MI</p>                                                                                                                                                                                                                                                 | <p>nu</p>                                                                                                                                                                                                                                                                                     |
| <b>Unheralded coronary death</b>                                                       | <p>Any CVD excluded.</p>                                                                                                                                                                                                                                                                                                                                                                                                         | <p>Any CVD excluded.</p>                                                                                       | <p>Any CVD excluded.</p>                                                                                                                                                              | <p>Any CVD excluded.</p>                                                                                                                                                                                                                                                                        | <p>I20-I25: Ischaemic heart disease</p>                                                                                                                                                                                                                                                       |
| <b>Heart failure</b>                                                                   | <p>G58..00: Heart Failure + 40 other Read codes for heart failure</p> <p>585f.00: Echocardiogram shows left ventricular systolic dysfunction</p> <p>585g.00: Echocardiogram shows left ventricular diastolic dysfunction</p>                                                                                                                                                                                                     | <p>nu</p>                                                                                                      | <p>nu</p>                                                                                                                                                                             | <p>I11.0: Hypertensive heart disease with (congestive) heart failure</p> <p>I13.0: Hypertensive heart and renal disease with (congestive) heart failure</p> <p>I13.2: Hypertensive heart and renal disease with both (congestive) heart failure and renal disease</p> <p>I50: Heart failure</p> | <p>I11.0 Hypertensive heart disease with (congestive) heart failure</p> <p>I13.0: Hypertensive heart and renal disease with (congestive) heart failure</p> <p>I13.2: Hypertensive heart and renal disease with both (congestive) heart failure and renal disease</p> <p>I50 Heart failure</p> |
| <b>Ventricular arrhythmias, cardioversion, cardiac arrest and sudden cardiac death</b> | <p>G757.00: Cardiac arrest + 30 other Read codes for ventricular fibrillation, asystole, cardiac arrest, cardiac resuscitation</p> <p>G575100: Sudden cardiac death, so described</p>                                                                                                                                                                                                                                            | <p>nu</p>                                                                                                      | <p>X50: External resuscitation.</p> <p>K59: Cardioverter defibrillator introduced through the vein</p>                                                                                | <p>I46.0: Cardiac arrest with successful resuscitation</p> <p>I46.1: Sudden cardiac death, so described</p> <p>I46.9: Cardiac arrest, unspecified</p> <p>I47.0: Re-entry ventricular arrhythmia</p> <p>I47.2: Ventricular tachycardia</p> <p>I49.0: Ventricular fibrillation and flutter</p>    | <p>I46.0: Cardiac arrest with successful resuscitation</p> <p>I46.1: Sudden cardiac death, so described</p> <p>I46.9: Cardiac arrest, unspecified</p> <p>I47.0: Re-entry ventricular arrhythmia</p> <p>I47.2: Ventricular tachycardia</p> <p>I49.0: Ventricular fibrillation and flutter</p>  |

|                                       |                                                                                                                                                                                                                                                        |    |                                                                                                                                                                                                                                               |                                                                                                                                                                                                                                                                                                                                                                |                                                                                                                                                                                                                                                                                                                                                                |
|---------------------------------------|--------------------------------------------------------------------------------------------------------------------------------------------------------------------------------------------------------------------------------------------------------|----|-----------------------------------------------------------------------------------------------------------------------------------------------------------------------------------------------------------------------------------------------|----------------------------------------------------------------------------------------------------------------------------------------------------------------------------------------------------------------------------------------------------------------------------------------------------------------------------------------------------------------|----------------------------------------------------------------------------------------------------------------------------------------------------------------------------------------------------------------------------------------------------------------------------------------------------------------------------------------------------------------|
| <b>Transient ischaemic attack</b>     | G65..12: Transient ischaemic attack + 5 other Read codes                                                                                                                                                                                               | nu | nu                                                                                                                                                                                                                                            | G45.8-G45.9: Transient cerebral ischaemic attack                                                                                                                                                                                                                                                                                                               | nu                                                                                                                                                                                                                                                                                                                                                             |
| <b>Ischaemic stroke</b>               | G64..11: CVA – cerebral artery occlusion + 9 other Read codes<br><br>7A20311: Carotid endarterectomy and patch + 4 other Read codes for carotid endarterectomy within 90 days of stroke not otherwise specified denote ischaemic stroke                | nu | L29.5: Endarterectomy of carotid artery NEC + 3 other codes for carotid endarterectomy or stenting within 90 days of stroke not otherwise specified denote ischaemic stroke                                                                   | I63: Cerebral infarction.                                                                                                                                                                                                                                                                                                                                      | I63: Cerebral infarction.                                                                                                                                                                                                                                                                                                                                      |
| <b>Stroke not otherwise specified</b> | G66..00: Stroke and cerebrovascular accident unspecified + 14 other Read codes                                                                                                                                                                         | nu | U54.3 Delivery of rehabilitation for stroke                                                                                                                                                                                                   | I64: Stroke, not specified as haemorrhage or infarction<br><br>G46.3-G46.7: Stroke syndromes                                                                                                                                                                                                                                                                   | I64: Stroke, not specified as haemorrhage or infarction<br><br>I67.2: Cerebral atherosclerosis<br><br>I67.9: Cerebrovascular disease, unspecified                                                                                                                                                                                                              |
| <b>Subarachnoid haemorrhage</b>       | G60X.00: Subarachnoid haemorrh from intracranial artery, unspecif + 2 other Read codes for subarachnoid haemorrhage                                                                                                                                    | nu | Nu                                                                                                                                                                                                                                            | I60: Subarachnoid haemorrhage.                                                                                                                                                                                                                                                                                                                                 | I60: Subarachnoid haemorrhage.                                                                                                                                                                                                                                                                                                                                 |
| <b>Intracerebral haemorrhage</b>      | G61..00: Intracerebral haemorrhage + 16 other Read codes for intracerebral haemorrhage.                                                                                                                                                                | nu | nu                                                                                                                                                                                                                                            | I61: Intracerebral haemorrhage.                                                                                                                                                                                                                                                                                                                                | I61: Intracerebral haemorrhage.                                                                                                                                                                                                                                                                                                                                |
| <b>Peripheral arterial disease</b>    | 63 codes for Lower limb peripheral arterial disease diagnosis (including diabetic PAD, gangrene and intermittent claudication).<br><br>136 Read codes for peripheral arterial disease procedures<br><br>2 Read codes for abnormal lower limb angiogram | nu | L50-L54: Bypass, reconstruction and other open operations on iliac artery.<br><br>L58-L60, L62: Bypass, reconstruction, transluminal operations or other open operations of femoral artery.<br><br>L65: Revision of reconstruction of artery. | I73.1: Thromboangiitis obliterans<br><br>I73.8: Other specified peripheral vascular diseases<br><br>I73.9: Peripheral vascular disease, unspecified<br><br>I74.3: Embolism and thrombosis of arteries of lower extremities<br><br>I74.4: Embolism and thrombosis of arteries of extremities, unspecified<br><br>I74.5: Embolism and thrombosis of iliac artery | I73.1: Thromboangiitis obliterans<br><br>I73.8: Other specified peripheral vascular diseases<br><br>I73.9: Peripheral vascular disease, unspecified<br><br>I74.3: Embolism and thrombosis of arteries of lower extremities<br><br>I74.4: Embolism and thrombosis of arteries of extremities, unspecified<br><br>I74.5: Embolism and thrombosis of iliac artery |

|                                  |                                                                                     |    |                                                                                                                                                                                                                                                                                                                                                                 |                                                                                                                                                                                                                                                                                                                                                                          |                                                                                                                                                                                                                                                                                                                                                                          |
|----------------------------------|-------------------------------------------------------------------------------------|----|-----------------------------------------------------------------------------------------------------------------------------------------------------------------------------------------------------------------------------------------------------------------------------------------------------------------------------------------------------------------|--------------------------------------------------------------------------------------------------------------------------------------------------------------------------------------------------------------------------------------------------------------------------------------------------------------------------------------------------------------------------|--------------------------------------------------------------------------------------------------------------------------------------------------------------------------------------------------------------------------------------------------------------------------------------------------------------------------------------------------------------------------|
| <b>Abdominal aortic aneurysm</b> | G714.00: Abdominal aortic aneurysm without mention of rupture + 12 other Read codes | nu | L18: Emergency replacement of aneurysmal segment of aorta<br>L19: Other replacement of aneurysmal segment of aorta<br>L20: Other emergency bypass of segment of aorta<br>L254: Operations on aneurysm of aorta NEC<br>L27: Transluminal insertion of stent graft for aneurysmal segment of aorta<br>L28: Transluminal operations on aneurysmal segment of aorta | I71.3: Abdominal aortic aneurysm, ruptured<br>I71.4: Abdominal aortic aneurysm, without mention of rupture<br>I71.5: Thoracoabdominal aortic aneurysm, ruptured<br>I71.6: Thoracoabdominal aortic aneurysm, without mention of rupture<br>I71.8: Aortic aneurysm of unspecified site, ruptured<br>I71.9: Aortic aneurysm of unspecified site, without mention of rupture | I71.3: Abdominal aortic aneurysm, ruptured<br>I71.4: Abdominal aortic aneurysm, without mention of rupture<br>I71.5: Thoracoabdominal aortic aneurysm, ruptured<br>I71.6: Thoracoabdominal aortic aneurysm, without mention of rupture<br>I71.8: Aortic aneurysm of unspecified site, ruptured<br>I71.9: Aortic aneurysm of unspecified site, without mention of rupture |
|----------------------------------|-------------------------------------------------------------------------------------|----|-----------------------------------------------------------------------------------------------------------------------------------------------------------------------------------------------------------------------------------------------------------------------------------------------------------------------------------------------------------------|--------------------------------------------------------------------------------------------------------------------------------------------------------------------------------------------------------------------------------------------------------------------------------------------------------------------------------------------------------------------------|--------------------------------------------------------------------------------------------------------------------------------------------------------------------------------------------------------------------------------------------------------------------------------------------------------------------------------------------------------------------------|

Note: AAA, aortic abdominal aneurysm; MI, myocardial infarction; nu = not used in definition.

†Primary cause of admission.

‡Underlying cause of death.

**Table S 2 Cohort summary characteristics<sup>1,2,3</sup>.**

|                                           | <b>SBP &lt;115 &amp; DBP &lt;75 mmHg</b> | <b>SBP 115-139 or DBP 75-89 mmHg</b> | <b>SBP 140-159 or DBP 90-99 mmHg</b> | <b>SBP &gt;160 or &gt;100 mmHg</b> |
|-------------------------------------------|------------------------------------------|--------------------------------------|--------------------------------------|------------------------------------|
| N patients                                | 202,435                                  | 638,658                              | 313,748                              | 103,165                            |
| Age, years                                | 38.7 (10.0)                              | 44.9 (13.6)                          | 56.4 (15.0)                          | 63.9 (14.5)                        |
| Female sex                                | 155,617 (76.9%)                          | 362,678 (56.8%)                      | 156,672 (49.9%)                      | 57,690 (55.9%)                     |
| White ethnicity                           | 99,397 (84.4%)                           | 322,704 (88.9%)                      | 173,824 (93.1%)                      | 60,237 (95.2%)                     |
| Most deprived quintile                    | 42,342 (20.9%)                           | 127,486 (20.0%)                      | 60,446 (19.3%)                       | 21,164 (20.5%)                     |
| <b>Smoking status<sup>4</sup></b>         |                                          |                                      |                                      |                                    |
| <i>Ex-smoker</i>                          | 26,524 (15.1%)                           | 92,996 (16.9%)                       | 51,381 (19.8%)                       | 14,266 (17.9%)                     |
| <i>Current smoker</i>                     | 43,814 (24.9%)                           | 129,724 (23.6%)                      | 47,217 (18.2%)                       | 12,053 (15.1%)                     |
| <b>Medical history</b>                    |                                          |                                      |                                      |                                    |
| Diabetes                                  | 1,907 (0.9%)                             | 20,198 (3.2%)                        | 17,685 (5.6%)                        | 5,912 (5.7%)                       |
| Kidney disease                            | 1,593 (0.8%)                             | 7,215 (1.1%)                         | 4,679 (1.5%)                         | 1,280 (1.2%)                       |
| COPD                                      | 1,773 (0.9%)                             | 9,436 (1.5%)                         | 7,847 (2.5%)                         | 3,121 (3.0%)                       |
| <b>Measurements<sup>4</sup></b>           |                                          |                                      |                                      |                                    |
| Body mass index, kg/m <sup>2</sup>        | 23.1 (21.1-25.7)                         | 25.6 (22.9-28.8)                     | 27.3 (24.4-30.9)                     | 27.5 (24.4-31.2)                   |
| Total cholesterol, mmol/L                 | 5.0 (4.3-5.7)                            | 5.2 (4.5-6.0)                        | 5.4 (4.7-6.2)                        | 5.7 (4.9-6.4)                      |
| HDL cholesterol, mmol/L                   | 1.4 (1.2-1.7)                            | 1.3 (1.1-1.6)                        | 1.3 (1.1-1.6)                        | 1.3 (1.1-1.6)                      |
| Systolic blood pressure, mmHg             | 106.7 (5.9)                              | 125.1 (7.7)                          | 146.2 (6.6)                          | 167.2 (11.5)                       |
| Diastolic blood pressure, mmHg            | 66.7 (5.1)                               | 77.6 (6.3)                           | 85.5 (7.0)                           | 91.6 (9.3)                         |
| Isolated systolic hypertension            | 0 (0.0%)                                 | 0 (0.0%)                             | 208,081 (66.3%)                      | 41,405 (40.1%)                     |
| Isolated diastolic hypertension           | 355 (0.2%)                               | 14,395 (2.3%)                        | 18,670 (6.0%)                        | 1,004 (1.0%)                       |
| Statins                                   | 1,570 (0.8%)                             | 21,526 (3.4%)                        | 19,798 (6.3%)                        | 4,010 (3.9%)                       |
| <b>Blood pressure lowering treatments</b> |                                          |                                      |                                      |                                    |
|                                           | 21,643 (10.7%)                           | 113,436 (17.8%)                      | 139,753 (44.5%)                      | 66,086 (64.1%)                     |
| <i>Thiazide diuretics</i>                 | 746 (0.4%)                               | 16,593 (2.6%)                        | 42,662 (13.6%)                       | 22,964 (22.3%)                     |
| <i>Beta-blockers</i>                      | 3,443 (1.7%)                             | 25,632 (4.0%)                        | 36,367 (11.6%)                       | 17,565 (17.0%)                     |
| <i>ACEI/ARBs</i>                          | 1,572 (0.8%)                             | 25,491 (4.0%)                        | 43,784 (14.0%)                       | 19,760 (19.2%)                     |
| <i>Calcium-channel blockers</i>           | 454 (0.2%)                               | 11,826 (1.9%)                        | 28,232 (9.0%)                        | 14,419 (14.0%)                     |
| <b>Number of baseline BP measurements</b> | 2 (1-3)                                  | 2 (1-3)                              | 3 (1-7)                              | 4 (1-9)                            |

<sup>1</sup> Patients are classified to the highest category based on their SBP or DBP.

<sup>2</sup> Continuous variables are summarized as median (inter-quartile range), except for systolic and diastolic blood pressure, summarized as mean (standard deviation). Categorical variables are summarized as number (% in the corresponding blood pressure category).

<sup>3</sup> Patients with missing baseline blood pressure measurements (N=679,354) were excluded.

<sup>4</sup> Missing data (%): Smoking status, 15%; Body mass index, 56%; Total cholesterol, 80%; HDL cholesterol, 84%.

Abbreviations: ACEI, Angiotensin-converting enzyme inhibitors; ARBs, Alpha-adrenoreceptor blocking drugs; COPD, chronic obstructive pulmonary disease; HDL, high-density lipoprotein cholesterol.

**Table S 3 Summary characteristics of people with recorded (main analysis dataset) and missing blood pressure among eligible patients (N=1,937,360).**

|                                    | Baseline BP recorded<br>(N=1,258,006) | Baseline BP missing<br>(N=679,354) | P-value for<br>difference* |
|------------------------------------|---------------------------------------|------------------------------------|----------------------------|
| Age, years                         | 45.0 (34.9-58.9)                      | 40.6 (32.0-52.5)                   | P<0.0001                   |
| Female sex                         | 732,657 (58.2%)                       | 238,561 (35.9%)                    | P<0.0001                   |
| White ethnicity                    | 656,162 (89.8%)                       | 254,958 (92.2%)                    | P<0.0001                   |
| Most deprived quintile             | 251,438 (20.0%)                       | 136,206 (20.5%)                    | P<0.0001                   |
| <b>Smoking status</b>              |                                       |                                    |                            |
| <i>Ex-smoker</i>                   | 185,167 (17.4%)                       | 41,728 (12.4%)                     | P<0.0001                   |
| <i>Current smoker</i>              | 232,808 (21.8%)                       | 52,550 (15.6%)                     | P<0.0001                   |
| <b>Medical history</b>             |                                       |                                    |                            |
| Diabetes                           | 45,702 (3.6%)                         | 3,064 (0.5%)                       | P<0.0001                   |
| Kidney disease                     | 14,767 (1.2%)                         | 2,728 (0.4%)                       | P<0.0001                   |
| COPD                               | 22,177 (1.8%)                         | 7,308 (1.1%)                       | P<0.0001                   |
| <b>Measurements</b>                |                                       |                                    |                            |
| Body mass index, kg/m <sup>2</sup> | 25.6 (22.8-29.0)                      | 24.9 (22.3-28.3)                   | P<0.0001                   |
| Total cholesterol, mmol/L          | 5.3 (4.6-6.1)                         | 5.3 (4.6-6.1)                      | P=0.10                     |
| HDL cholesterol, mmol/L            | 1.3 (1.1-1.6)                         | 1.3 (1.1-1.6)                      | P=0.03                     |
| <b>Medication use</b>              |                                       |                                    |                            |
| Thiazide diuretics                 | 82,965 (6.6%)                         | 6,451 (1.0%)                       | P<0.0001                   |
| Beta-blockers                      | 83,007 (6.6%)                         | 9,320 (1.4%)                       | P<0.0001                   |
| ACEI/ARBs                          | 90,607 (7.2%)                         | 5,449 (0.8%)                       | P<0.0001                   |
| Calcium-channel blockers           | 54,931 (4.4%)                         | 3,203 (0.5%)                       | P<0.0001                   |
| Statins                            | 46,904 (3.7%)                         | 1,568 (0.2%)                       | P<0.0001                   |

\*Two-sided, with Bonferroni correction for multiple comparisons.

Continuous variables are summarised as median (IQR) and categorical as N (%).

Abbreviations: ACEI, Angiotensin-converting enzyme inhibitors; ARBs, Alpha-adrenoreceptor blocking drugs; COPD, chronic obstructive pulmonary disease; HDL, high-density lipoprotein cholesterol.

**Table S 4 Estimates of lifetime risks and life-years lost to CVD associated with hypertension at different index ages (30, 60, 80) up to age 95.**

| EVENTS                      | Lifetime risks          |                         |                          |                         | Life-years lost to CVD  |                                |                                 |
|-----------------------------|-------------------------|-------------------------|--------------------------|-------------------------|-------------------------|--------------------------------|---------------------------------|
|                             | Normotensives           | Hypertensives           | Lifetime risk difference | Lifetime risk ratio     | All hypertensives       | Isolated systolic hypertension | Isolated diastolic hypertension |
| <b>Index age 30</b>         |                         |                         |                          |                         |                         |                                |                                 |
| Stable angina               | 4.9 (4.7-5.2)           | 8.9 (8.7-9.2)           | 4.0 (3.7, 4.3)           | 1.82 (1.76-1.87)        | 1.11 (1.03,1.19)        | 0.3 (0.26,0.33)                | 0.02 (-0.01,0.04)               |
| Unstable angina             | 6.7 (6.4-7.0)           | 10.1 (9.8-10.3)         | 3.4 (3.0, 3.7)           | 1.5 (1.46-1.55)         | 1.04 (0.95,1.13)        | 0.21 (0.17,0.25)               | 0.01 (-0.01,0.04)               |
| Myocardial infarction       | 5.5 (5.3-5.8)           | 8.0 (7.8-8.3)           | 2.5 (2.2, 2.8)           | 1.45 (1.41-1.49)        | 0.75 (0.67,0.83)        | 0.21 (0.17,0.25)               | 0.06 (0.03,0.08)                |
| Unheralded CHD death        | 1.9 (1.8-2.1)           | 2.5 (2.4-2.6)           | 0.6 (0.3, 0.8)           | 1.29 (1.22-1.36)        | 0.15 (0.11,0.2)         | 0.04 (0.02,0.05)               | 0.03 (0.01,0.05)                |
| Heart failure               | 5.2 (4.9-5.6)           | 7.8 (7.6-8.1)           | 2.6 (2.2, 3.0)           | 1.5 (1.44-1.55)         | 0.58 (0.51,0.64)        | 0.1 (0.07,0.13)                | 0.04 (0.02,0.07)                |
| Cardiac arrest/SCD          | 1.8 (1.7-2.0)           | 2.3 (2.2-2.4)           | 0.5 (0.3, 0.7)           | 1.26 (1.17-1.34)        | 0.16 (0.11,0.2)         | 0.01 (-0.01,0.03)              | 0.03 (0.00,0.05)                |
| Transient ischaemic attack  | 5.9 (5.6-6.2)           | 6.5 (6.3-6.7)           | 0.6 (0.3, 1.0)           | 1.11 (1.07-1.14)        | 0.26 (0.18,0.33)        | 0.06 (0.03,0.09)               | 0.02 (0.00,0.05)                |
| Ischaemic stroke            | 6.5 (6.2-6.9)           | 7.6 (7.3-7.8)           | 1.0 (0.7, 1.4)           | 1.16 (1.12-1.2)         | 0.35 (0.27,0.42)        | 0.06 (0.03,0.09)               | 0.00 (-0.03,0.03)               |
| Subarachnoid haemorrhage    | 0.6 (0.5-0.7)           | 0.9 (0.7-1.0)           | 0.3 (0.2, 0.4)           | 1.48 (1.27-1.68)        | 0.09 (0.06,0.12)        | 0.04 (0.02,0.05)               | 0.00 (-0.01,0.01)               |
| Intracerebral haemorrhage   | 0.9 (0.8-1.0)           | 1.3 (1.2-1.4)           | 0.4 (0.2, 0.5)           | 1.4 (1.29-1.51)         | 0.1 (0.07,0.14)         | 0.03 (0.02,0.04)               | 0.00 (-0.01,0.02)               |
| Peripheral arterial disease | 4.5 (4.2-4.7)           | 5.8 (5.6-6.0)           | 1.3 (1.0, 1.6)           | 1.3 (1.25-1.34)         | 0.4 (0.33,0.46)         | 0.14 (0.11,0.17)               | -0.01 (-0.03,0.01)              |
| Abdominal aortic aneurysm   | 1.5 (1.4-1.7)           | 1.6 (1.5-1.7)           | 0.1 (-0.1, 0.3)          | 1.05 (0.97-1.13)        | 0.04 (0,0.07)           | -0.01 (-0.02,0)                | 0.01 (0.00,0.03)                |
| <b>Total CVD</b>            | <b>46.1 (45.5-46.8)</b> | <b>63.3 (62.9-63.8)</b> | <b>17.2 (13.9, 20.5)</b> | <b>1.37 (1.36-1.39)</b> | <b>5.02 (4.84,5.19)</b> | <b>1.18 (1.1,1.26)</b>         | <b>0.23 (0.16,0.29)</b>         |
| <b>Index age 60</b>         |                         |                         |                          |                         |                         |                                |                                 |
| Stable angina               | 4.5 (4.3-4.7)           | 8.1 (7.9-8.4)           | 3.6 (3.3, 3.9)           | 1.81 (1.75-1.87)        | 0.76 (0.71,0.81)        | 0.36 (0.32,0.4)                | 0.00 (0.00,0.00)                |
| Unstable angina             | 5.9 (5.6-6.2)           | 8.6 (8.3-8.9)           | 2.7 (2.4, 3.0)           | 1.45 (1.41-1.5)         | 0.61 (0.55,0.67)        | 0.24 (0.19,0.28)               | 0.00 (0.00,0.00)                |
| Myocardial infarction       | 5.0 (4.8-5.2)           | 7.1 (6.9-7.4)           | 2.1 (1.8, 2.4)           | 1.43 (1.38-1.48)        | 0.46 (0.41,0.52)        | 0.24 (0.2,0.28)                | 0.01 (0.00,0.01)                |
| Unheralded CHD death        | 1.9 (1.8-2.1)           | 2.4 (2.3-2.6)           | 0.5 (0.3, 0.7)           | 1.25 (1.18-1.32)        | 0.11 (0.07,0.14)        | 0.05 (0.03,0.08)               | 0.00 (0.00,0.01)                |
| Heart failure               | 5.5 (5.2-5.9)           | 8.0 (7.7-8.3)           | 2.5 (2.1, 2.9)           | 1.45 (1.39-1.5)         | 0.47 (0.41,0.53)        | 0.17 (0.13,0.21)               | 0.01 (0.00,0.01)                |
| Cardiac arrest/SCD          | 1.7 (1.6-1.9)           | 2.0 (1.9-2.2)           | 0.3 (0.1, 0.5)           | 1.16 (1.08-1.24)        | 0.08 (0.05,0.11)        | 0.01 (-0.01,0.04)              | 0.00 (0.00,0.00)                |
| Transient ischaemic attack  | 5.9 (5.6-6.3)           | 6.6 (6.4-6.8)           | 0.6 (0.3, 1.0)           | 1.11 (1.07-1.15)        | 0.2 (0.13,0.26)         | 0.08 (0.04,0.13)               | 0.00 (0.00,0.00)                |
| Ischaemic stroke            | 6.6 (6.3-7.0)           | 7.7 (7.5-8.0)           | 1.1 (0.7, 1.5)           | 1.16 (1.12-1.21)        | 0.27 (0.21,0.34)        | 0.1 (0.05,0.14)                | 0.00 (0.00,0.00)                |
| Subarachnoid haemorrhage    | 0.5 (0.4-0.6)           | 0.7 (0.6-0.9)           | 0.3 (0.1, 0.4)           | 1.52 (1.27-1.77)        | 0.05 (0.03,0.07)        | 0.03 (0.02,0.05)               | 0.00 (0.00,0.00)                |
| Intracerebral haemorrhage   | 0.9 (0.8-1.0)           | 1.3 (1.2-1.4)           | 0.4 (0.2, 0.5)           | 1.41 (1.3-1.53)         | 0.08 (0.05,0.1)         | 0.04 (0.02,0.06)               | 0.00 (0.00,0.00)                |
| Peripheral arterial disease | 4.4 (4.1-4.6)           | 5.9 (5.7-6.1)           | 1.5 (1.2, 1.8)           | 1.35 (1.3-1.4)          | 0.34 (0.29,0.39)        | 0.19 (0.15,0.23)               | 0.00 (0.00,0.00)                |
| Abdominal aortic aneurysm   | 1.7 (1.5-1.9)           | 1.7 (1.5-1.8)           | 0.0 (-0.2, 0.2)          | 0.99 (0.92-1.06)        | 0.02 (-0.02,0.05)       | -0.01 (-0.04,0.01)             | 0.00 (0.00,0.00)                |
| <b>Total CVD</b>            | <b>44.6 (43.9-45.3)</b> | <b>60.2 (59.6-60.7)</b> | <b>15.6 (12.4-18.8)</b>  | <b>1.35 (1.33-1.37)</b> | <b>3.44 (3.3,3.58)</b>  | <b>1.5 (1.4,1.61)</b>          | <b>0.03 (0.02,0.03)</b>         |
| <b>Index age 80</b>         |                         |                         |                          |                         |                         |                                |                                 |
| Stable angina               | 3.6 (3.4-3.8)           | 6.6 (6.3-6.8)           | 3 (2.7, 3.2)             | 1.84 (1.77-1.9)         | 0.31 (0.28,0.33)        | 0.16 (0.14,0.18)               | 0.00 (0.00,0.00)                |
| Unstable angina             | 4.7 (4.5-5.0)           | 6.9 (6.6-7.2)           | 2.2 (1.9, 2.5)           | 1.46 (1.4-1.53)         | 0.23 (0.2,0.26)         | 0.1 (0.08,0.12)                | 0.00 (0.00,0.00)                |
| Myocardial infarction       | 4.0 (3.8-4.2)           | 5.9 (5.6-6.1)           | 1.8 (1.6, 2.1)           | 1.45 (1.4-1.51)         | 0.19 (0.17,0.22)        | 0.11 (0.09,0.13)               | 0.00 (0.00,0.00)                |
| Unheralded CHD death        | 1.8 (1.6-2.0)           | 2.3 (2.1-2.5)           | 0.5 (0.4, 0.7)           | 1.31 (1.21-1.41)        | 0.06 (0.05,0.08)        | 0.03 (0.02,0.05)               | 0.00 (0.00,0.00)                |
| Heart failure               | 5.3 (4.9-5.7)           | 8.0 (7.6-8.4)           | 2.8 (2.4, 3.2)           | 1.53 (1.44-1.61)        | 0.31 (0.27,0.34)        | 0.12 (0.09,0.15)               | 0.00 (0.00,0.00)                |
| Cardiac arrest/SCD          | 1.4 (1.2-1.5)           | 1.6 (1.5-1.7)           | 0.2 (0.1, 0.4)           | 1.17 (1.08-1.25)        | 0.03 (0.02,0.04)        | 0.01 (0,0.02)                  | 0.00 (0.00,0.00)                |
| Transient ischaemic attack  | 4.8 (4.5-5.1)           | 5.5 (5.3-5.7)           | 0.7 (0.4, 1.0)           | 1.14 (1.09-1.19)        | 0.09 (0.06,0.12)        | 0.04 (0.02,0.06)               | 0.00 (0.00,0.00)                |
| Ischaemic stroke            | 5.8 (5.5-6.2)           | 7.1 (6.8-7.4)           | 1.3 (0.9, 1.6)           | 1.22 (1.16-1.27)        | 0.16 (0.12,0.19)        | 0.06 (0.04,0.09)               | 0.00 (0.00,0.00)                |
| Subarachnoid haemorrhage    | 0.4 (0.4-0.5)           | 0.7 (0.6-0.8)           | 0.2 (0.1, 0.3)           | 1.6 (1.34-1.85)         | 0.03 (0.02,0.04)        | 0.02 (0.01,0.03)               | 0.00 (0.00,0.00)                |
| Intracerebral haemorrhage   | 0.7 (0.6-0.8)           | 1.1 (1.0-1.2)           | 0.3 (0.2, 0.5)           | 1.46 (1.31-1.61)        | 0.04 (0.02,0.05)        | 0.02 (0.01,0.03)               | 0.00 (0.00,0.00)                |
| Peripheral arterial disease | 3.4 (3.2-3.6)           | 4.6 (4.4-4.8)           | 1.3 (1.0, 1.5)           | 1.38 (1.32-1.44)        | 0.14 (0.12,0.16)        | 0.08 (0.07,0.1)                | 0.00 (0.00,0.00)                |
| Abdominal aortic aneurysm   | 1.4 (1.2-1.6)           | 1.5 (1.3-1.6)           | 0.0 (-0.1, 0.2)          | 1.03 (0.93-1.12)        | 0.01 (-0.01,0.03)       | -0.01 (-0.02,0.01)             | 0.00 (0.00,0.00)                |
| <b>Total CVD</b>            | <b>37.3 (36.6-38.0)</b> | <b>51.7 (51.1-52.4)</b> | <b>14.4 (11.6-17.2)</b>  | <b>1.39 (1.36-1.41)</b> | <b>1.59 (1.52,1.66)</b> | <b>0.75 (0.69,0.8)</b>         | <b>0.00 (0.00,0.00)</b>         |



**Table S 5 Hazard ratios (95% CIs) for 10 mmHg higher systolic blood pressure adjusted for age and sex.**

| <b>Event</b>                | <b>HR</b> | <b>Lower<br/>95% CI</b> | <b>Upper<br/>95% CI</b> |
|-----------------------------|-----------|-------------------------|-------------------------|
| Stable angina               | 1.19      | 1.18                    | 1.20                    |
| Unstable angina             | 1.13      | 1.11                    | 1.15                    |
| Myocardial infarction       | 1.15      | 1.14                    | 1.16                    |
| Unheralded CHD death        | 1.12      | 1.10                    | 1.15                    |
| Heart failure               | 1.12      | 1.11                    | 1.14                    |
| Cardiac arrest/SCD          | 1.10      | 1.07                    | 1.12                    |
| Transient ischaemic attack  | 1.07      | 1.06                    | 1.08                    |
| Ischaemic stroke            | 1.16      | 1.14                    | 1.18                    |
| Intracerebral haemorrhage   | 1.20      | 1.17                    | 1.23                    |
| Subarachnoid haemorrhage    | 1.18      | 1.13                    | 1.23                    |
| Peripheral arterial disease | 1.16      | 1.15                    | 1.18                    |
| Abdominal aortic aneurysm   | 1.02      | 1.00                    | 1.05                    |

Figure S 1 Study flow diagram

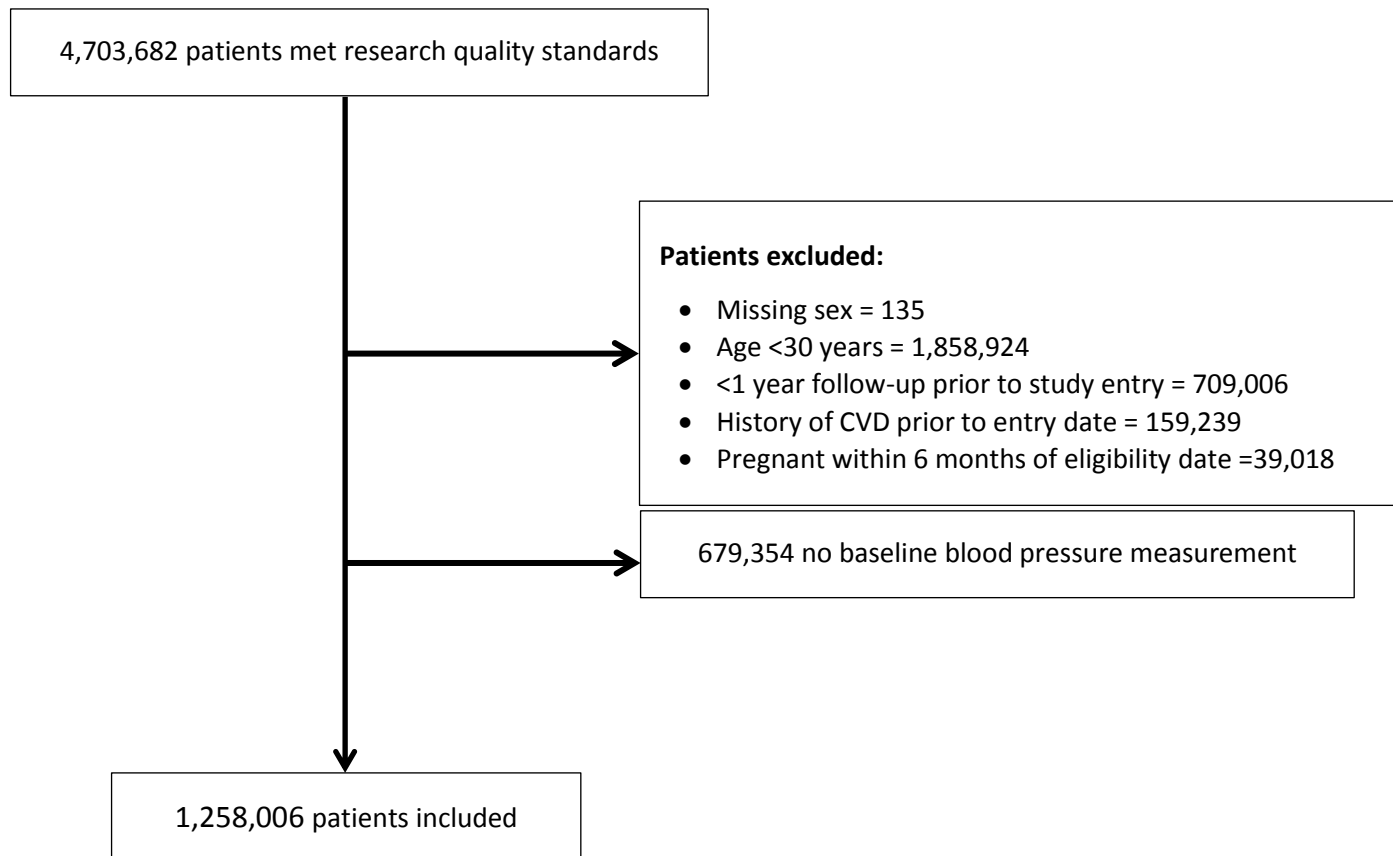

**Figure S 2 The distribution of demographic characteristics among primary care practices contributing to the main analysis.**

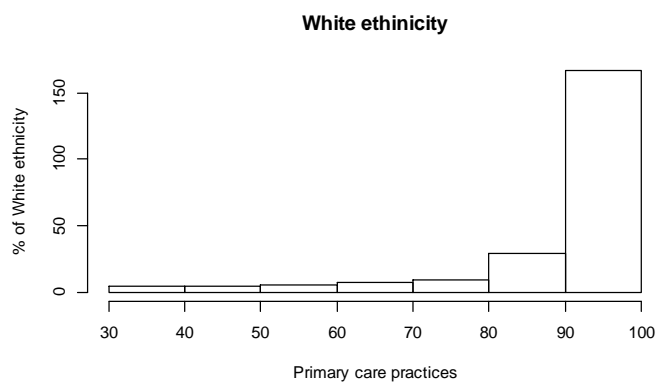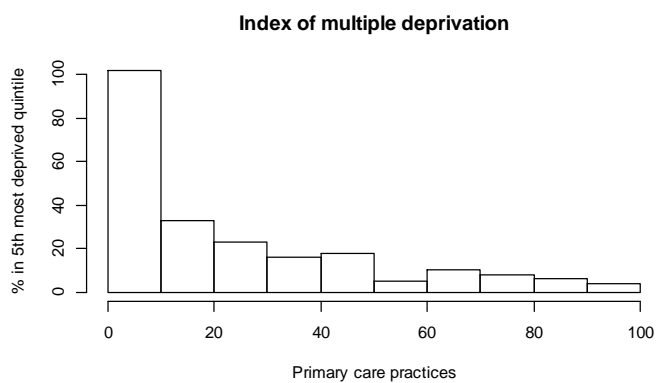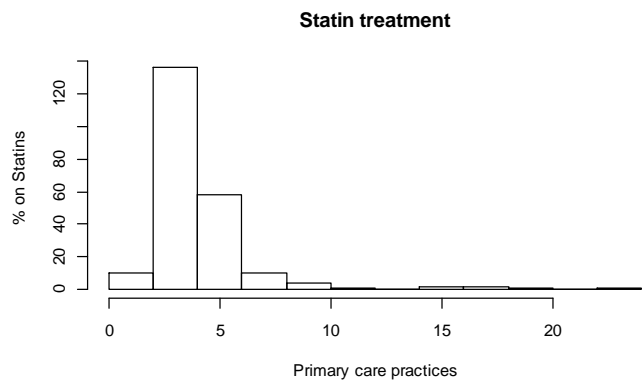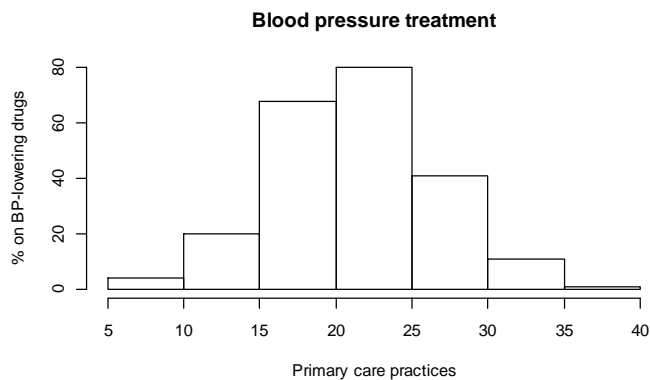

**Figure S 3 Hazard ratios (95% CIs) per 10 mmHg higher mid blood pressure (mid-BP), mean arterial blood pressure (MAP) and pulse pressure (PP) adjusted for age and sex.\***

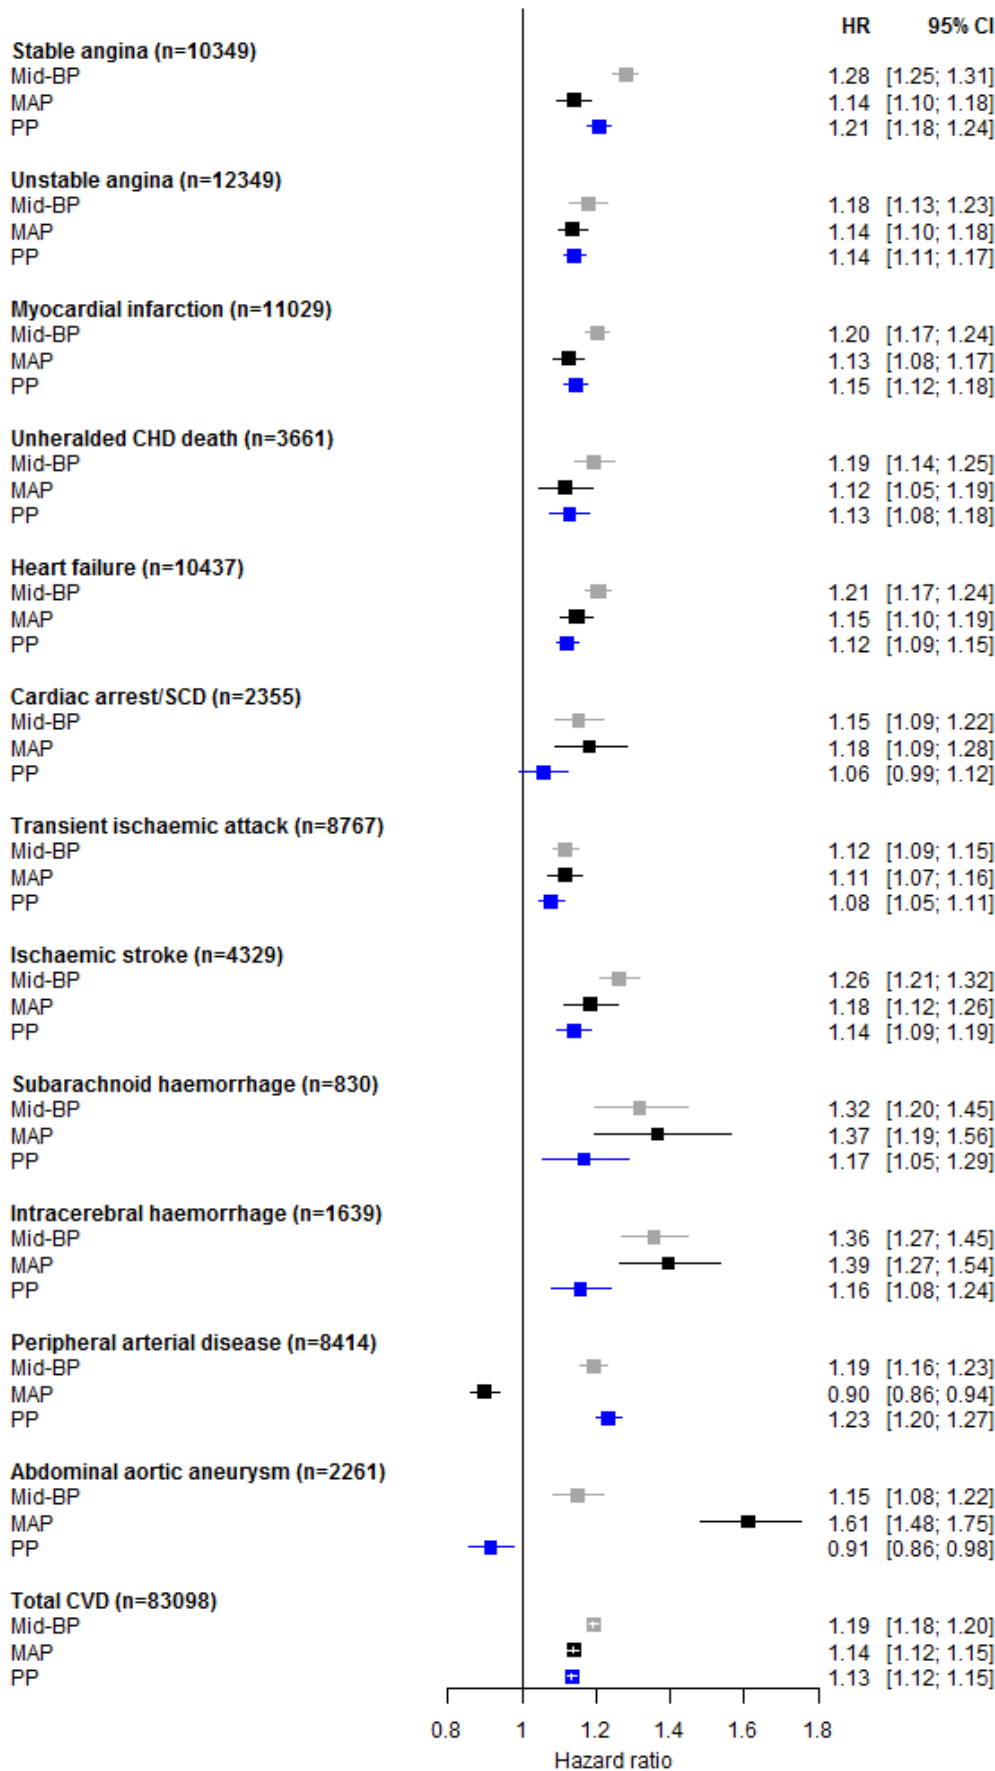

\*Adjustments include age, quadratic age, and stratification by sex and primary care practice. Confidence intervals are Bonferroni-corrected (3 variables X 12 endpoints = 36 tests in total).

**Figure S 4 Hazard ratios (95% CIs) by sex per 20/10 mmHg higher systolic or diastolic blood pressure adjusted for age.\***

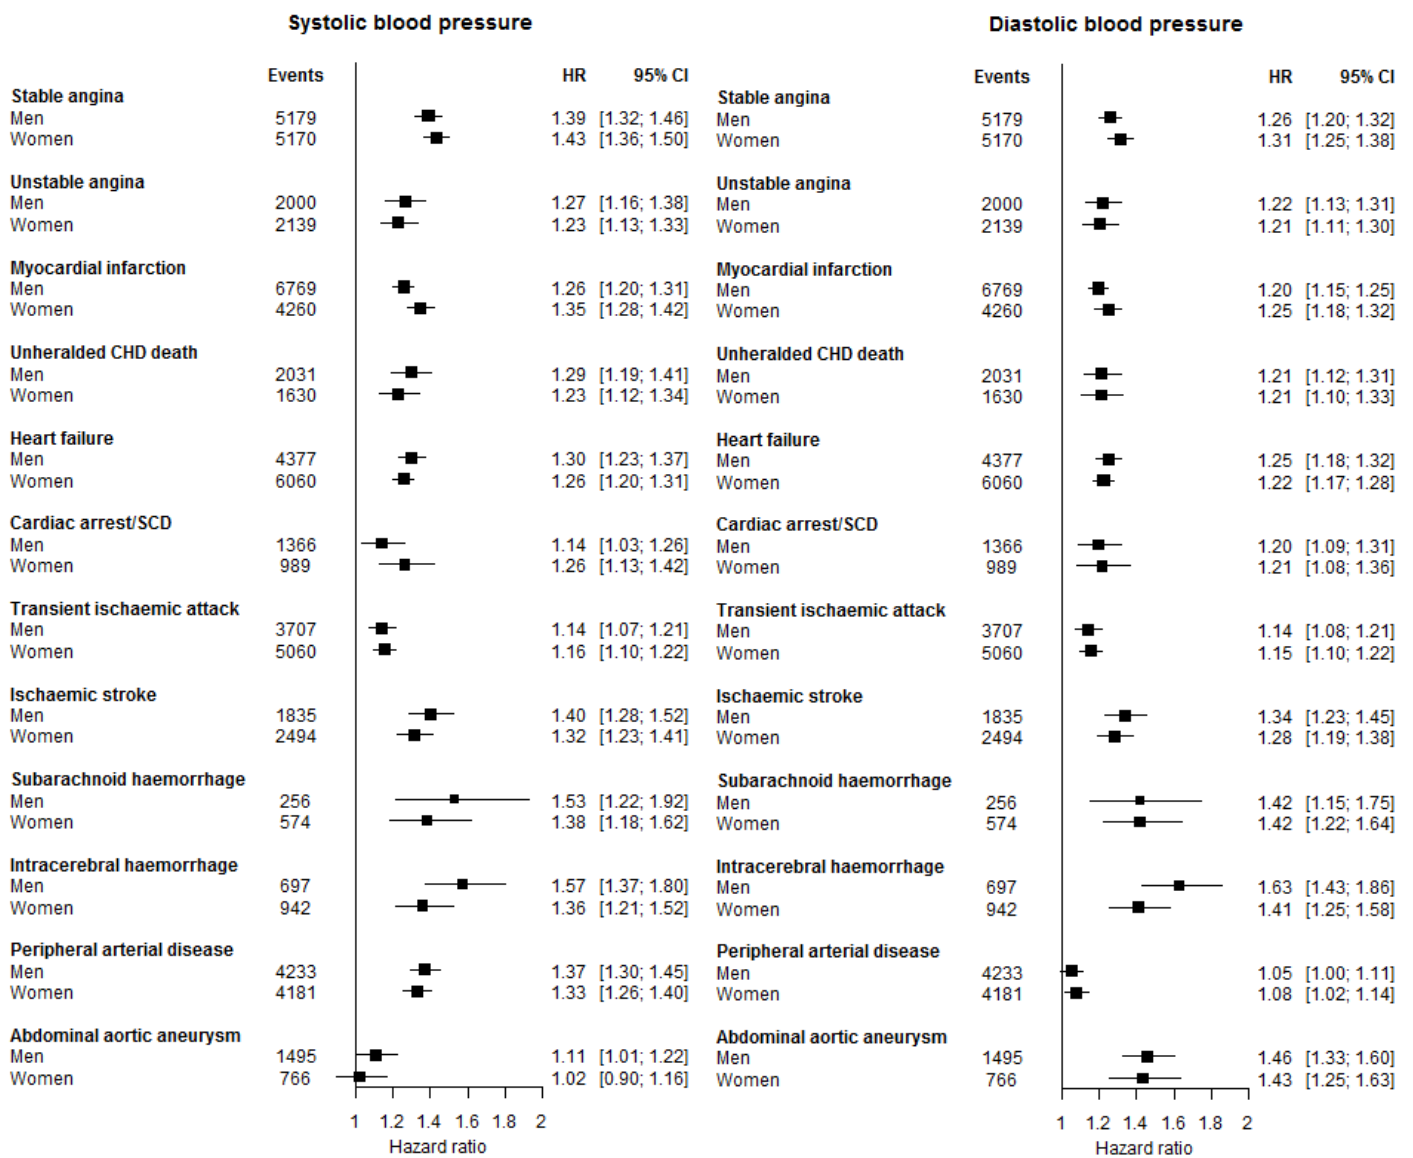

\*Models were fitted separately for men and women and included continuous age, quadratic age, with stratification by primary care practice. Confidence intervals are Bonferroni-corrected (2 sexes X 12 endpoints=24 tests).

**Figure S 5 Adjusted hazard ratios (95% CIs) per 20/10 mmHg higher systolic or diastolic blood pressure.\***

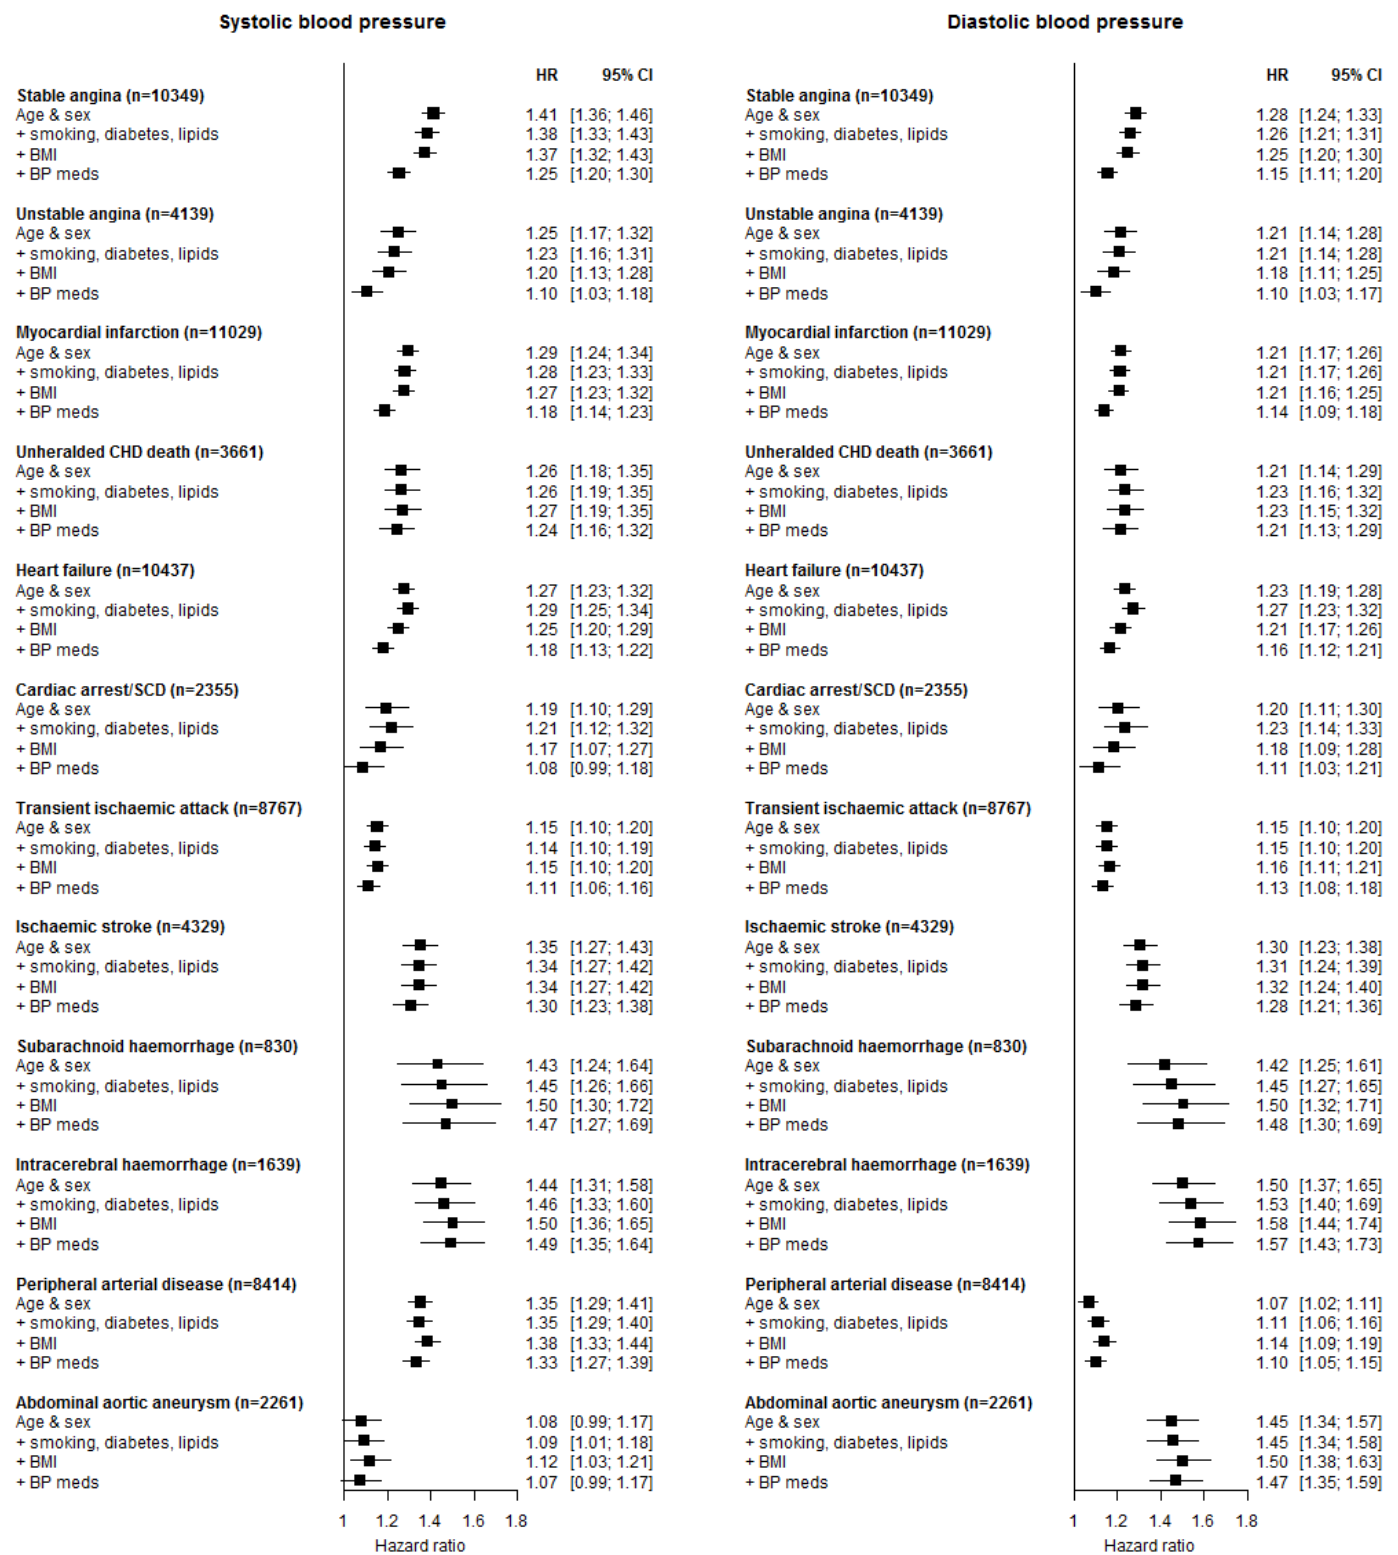

Abbreviations: BP meds, blood pressure lowering medications; lipids include total and HDL cholesterol.

\*All models included continuous age, quadratic age, with stratification by sex and primary care practice, in addition to the covariates listed above. Confidence intervals are Bonferroni-corrected (4 models X 12 endpoints=48 tests).

**Figure S 6 Hazard ratios (95% CIs) per 20 mmHg higher systolic blood pressure adjusted for age and sex estimated separately in people with (N= 265,473) or without (N= 992,533) BP-lowering drugs at baseline.\***

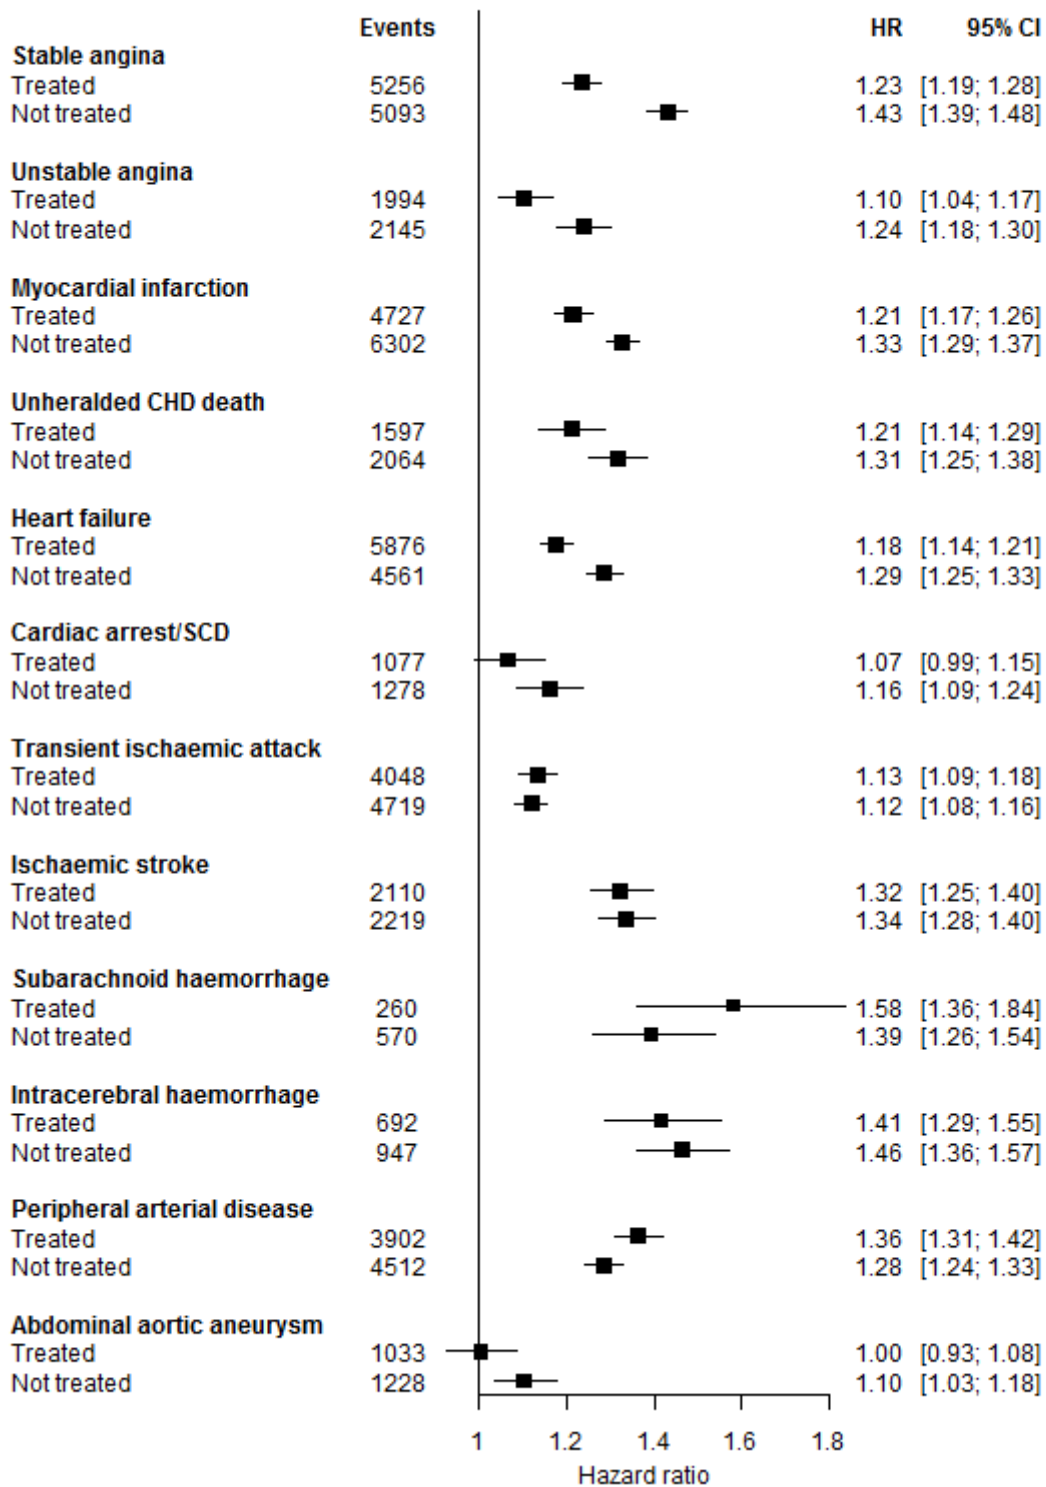

\*Models were fitted separately in people treated or not treated with BP medications at baseline, with adjustments for age, quadratic age, and stratification by sex and primary care practice. Confidence intervals are Bonferroni-corrected (2 groups X 12 endpoints=24 tests in total).

**Figure S 7 Hazard ratios (95% CIs) per 10 mmHg higher diastolic blood pressure adjusted for age and sex estimated separately in people with (N= 265,473) or without (N= 992,533) BP-lowering drugs at baseline.**

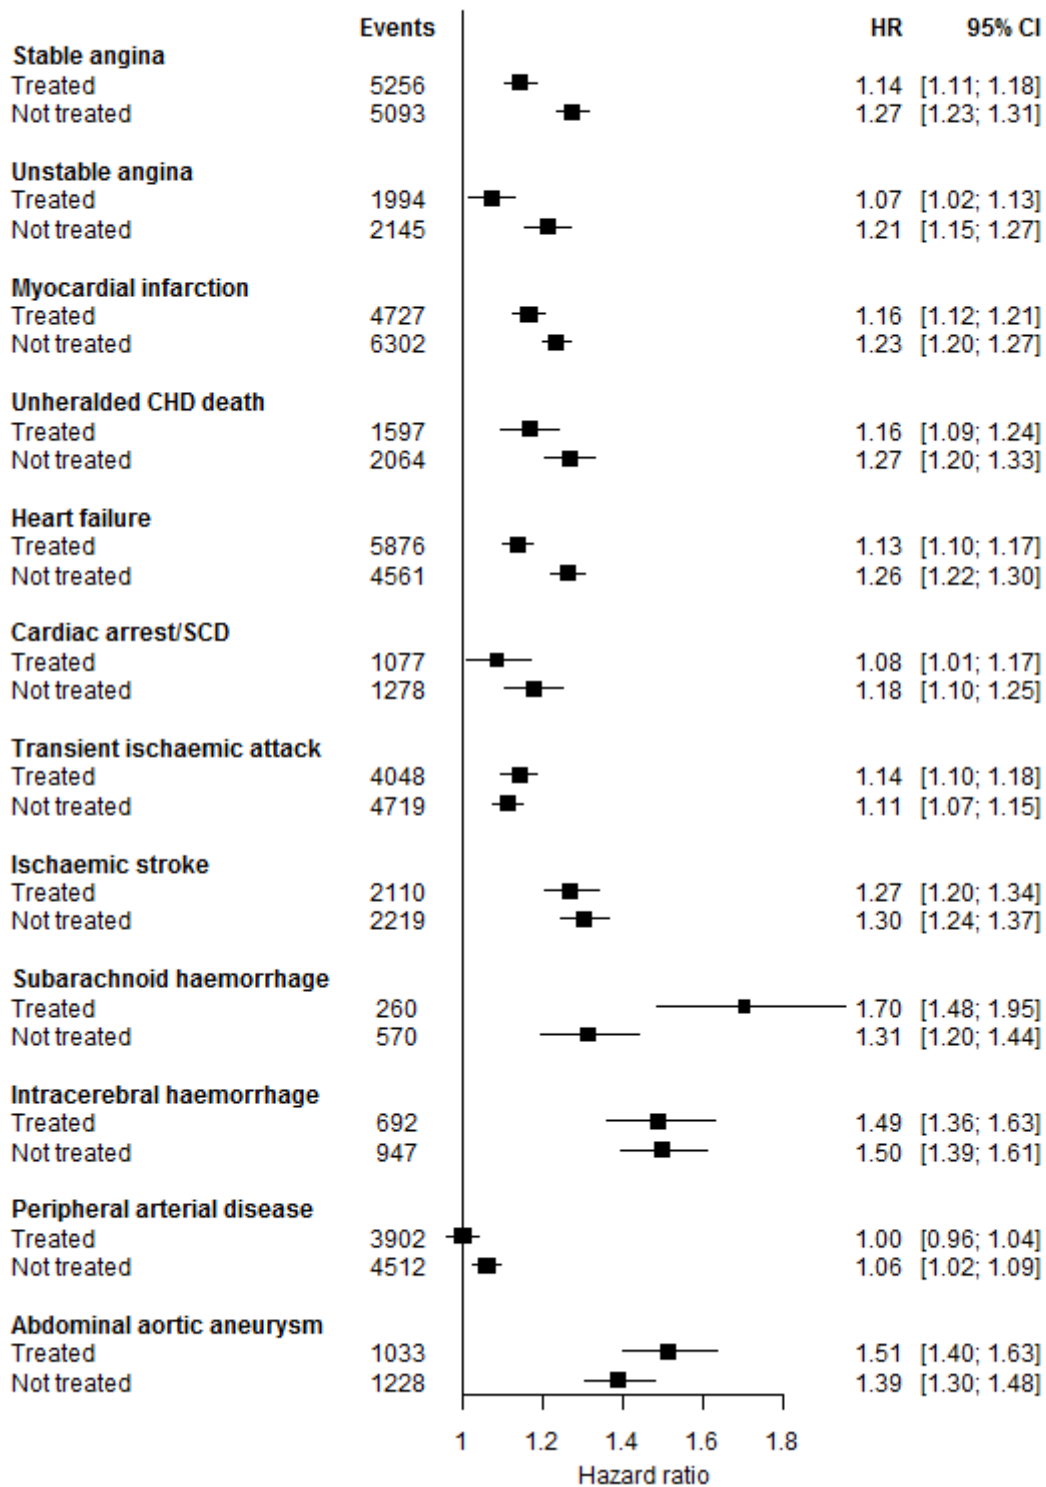

\*Models were fitted separately in people treated or not treated with BP medications at baseline, with adjustments for age, quadratic age, and stratification by sex and primary care practice. Confidence intervals are Bonferroni-corrected (2 groups X 12 endpoints=24 tests in total).



**Figure S 8 Hazard ratios (95% CIs) for the associations of different cutoffs of systolic blood pressure (reference 115 mmHg) with cardiovascular endpoints in men adjusted for age (BP was modelled as a continuous variable using splines with 3 knots).**

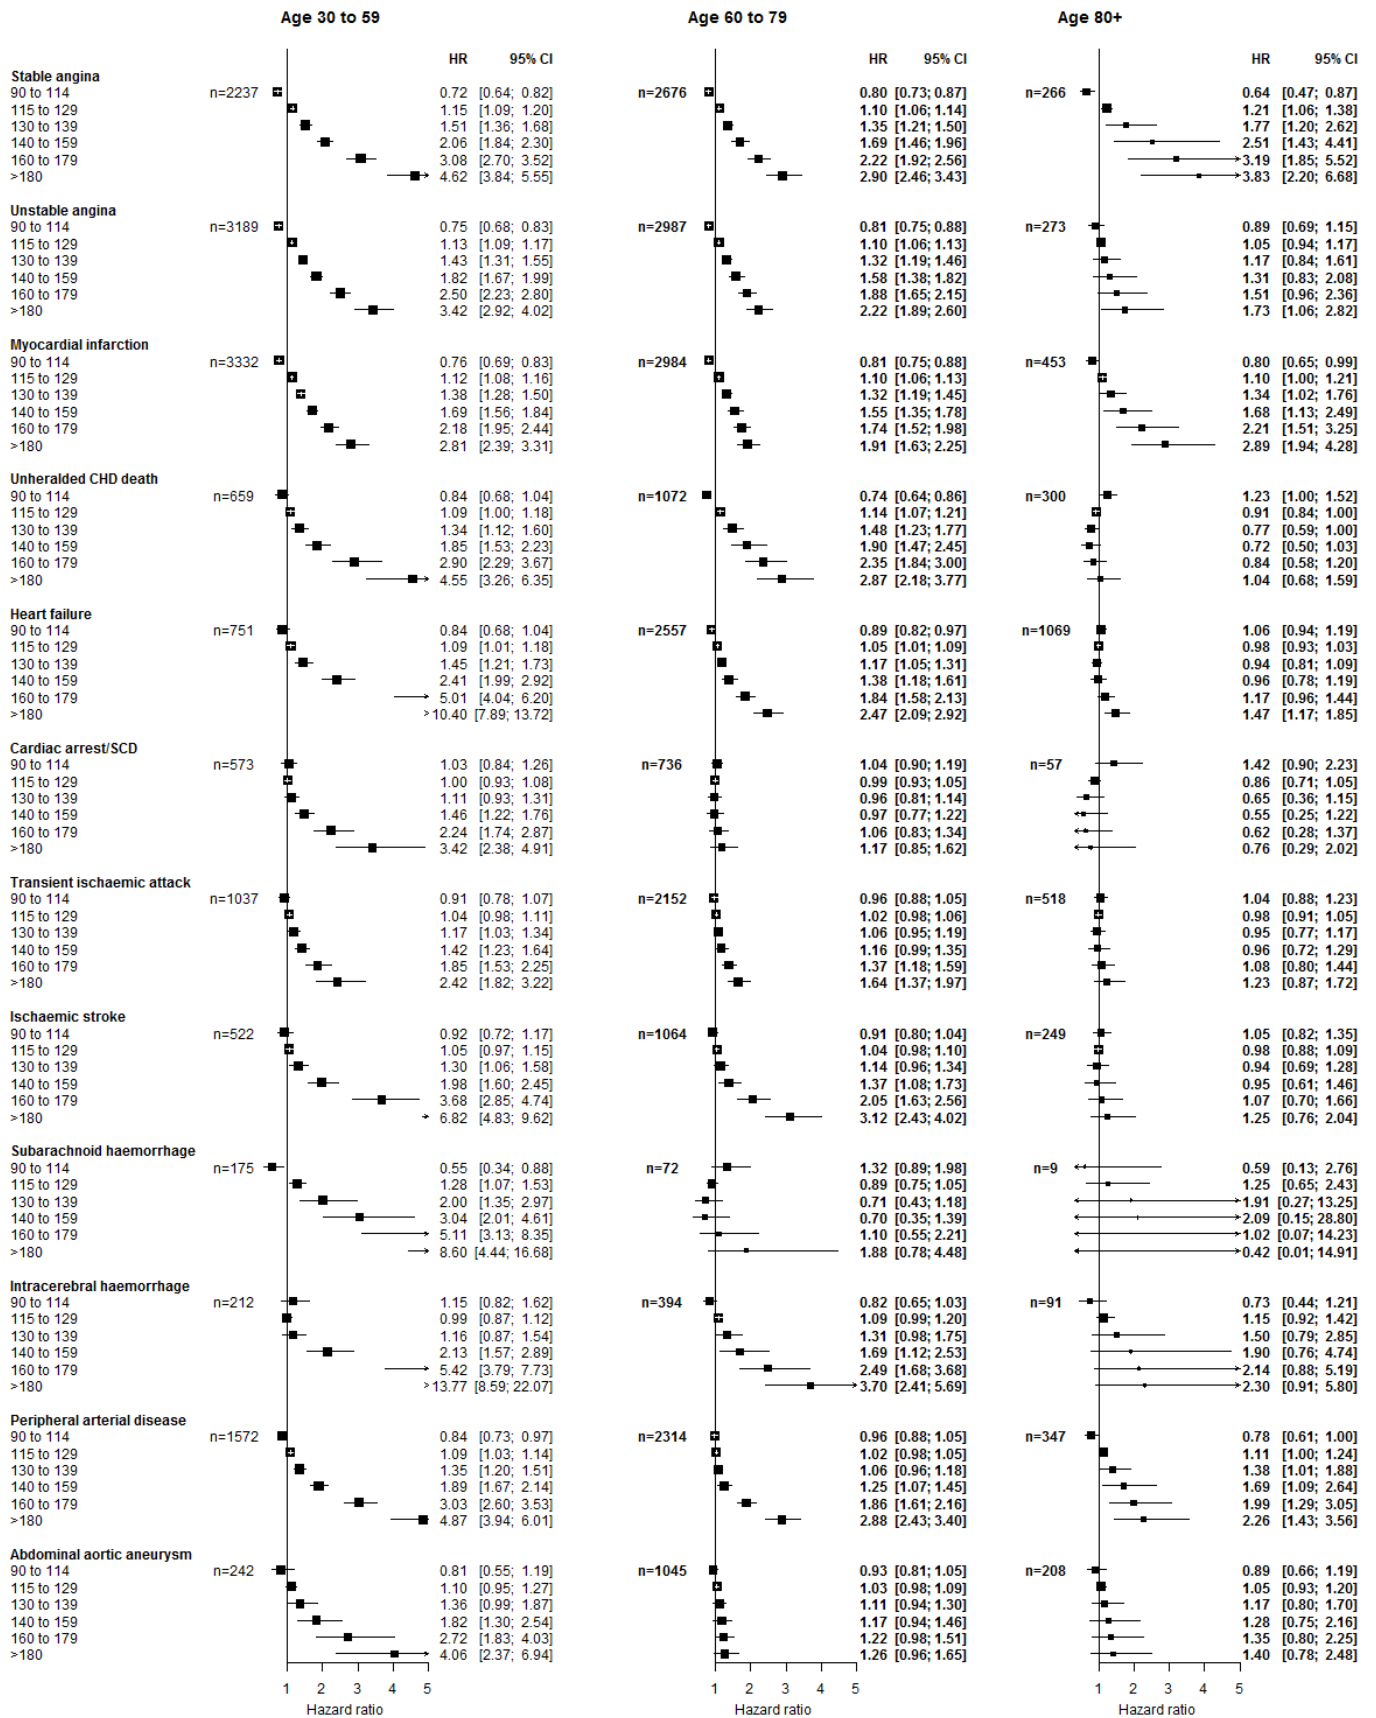

**Figure S 9 Hazard ratios (95% CIs) for the associations of different cutoffs of diastolic blood pressure (reference 75 mmHg) with cardiovascular endpoints in men adjusted for age (BP was modelled as a continuous variable using splines with 3 knots).**

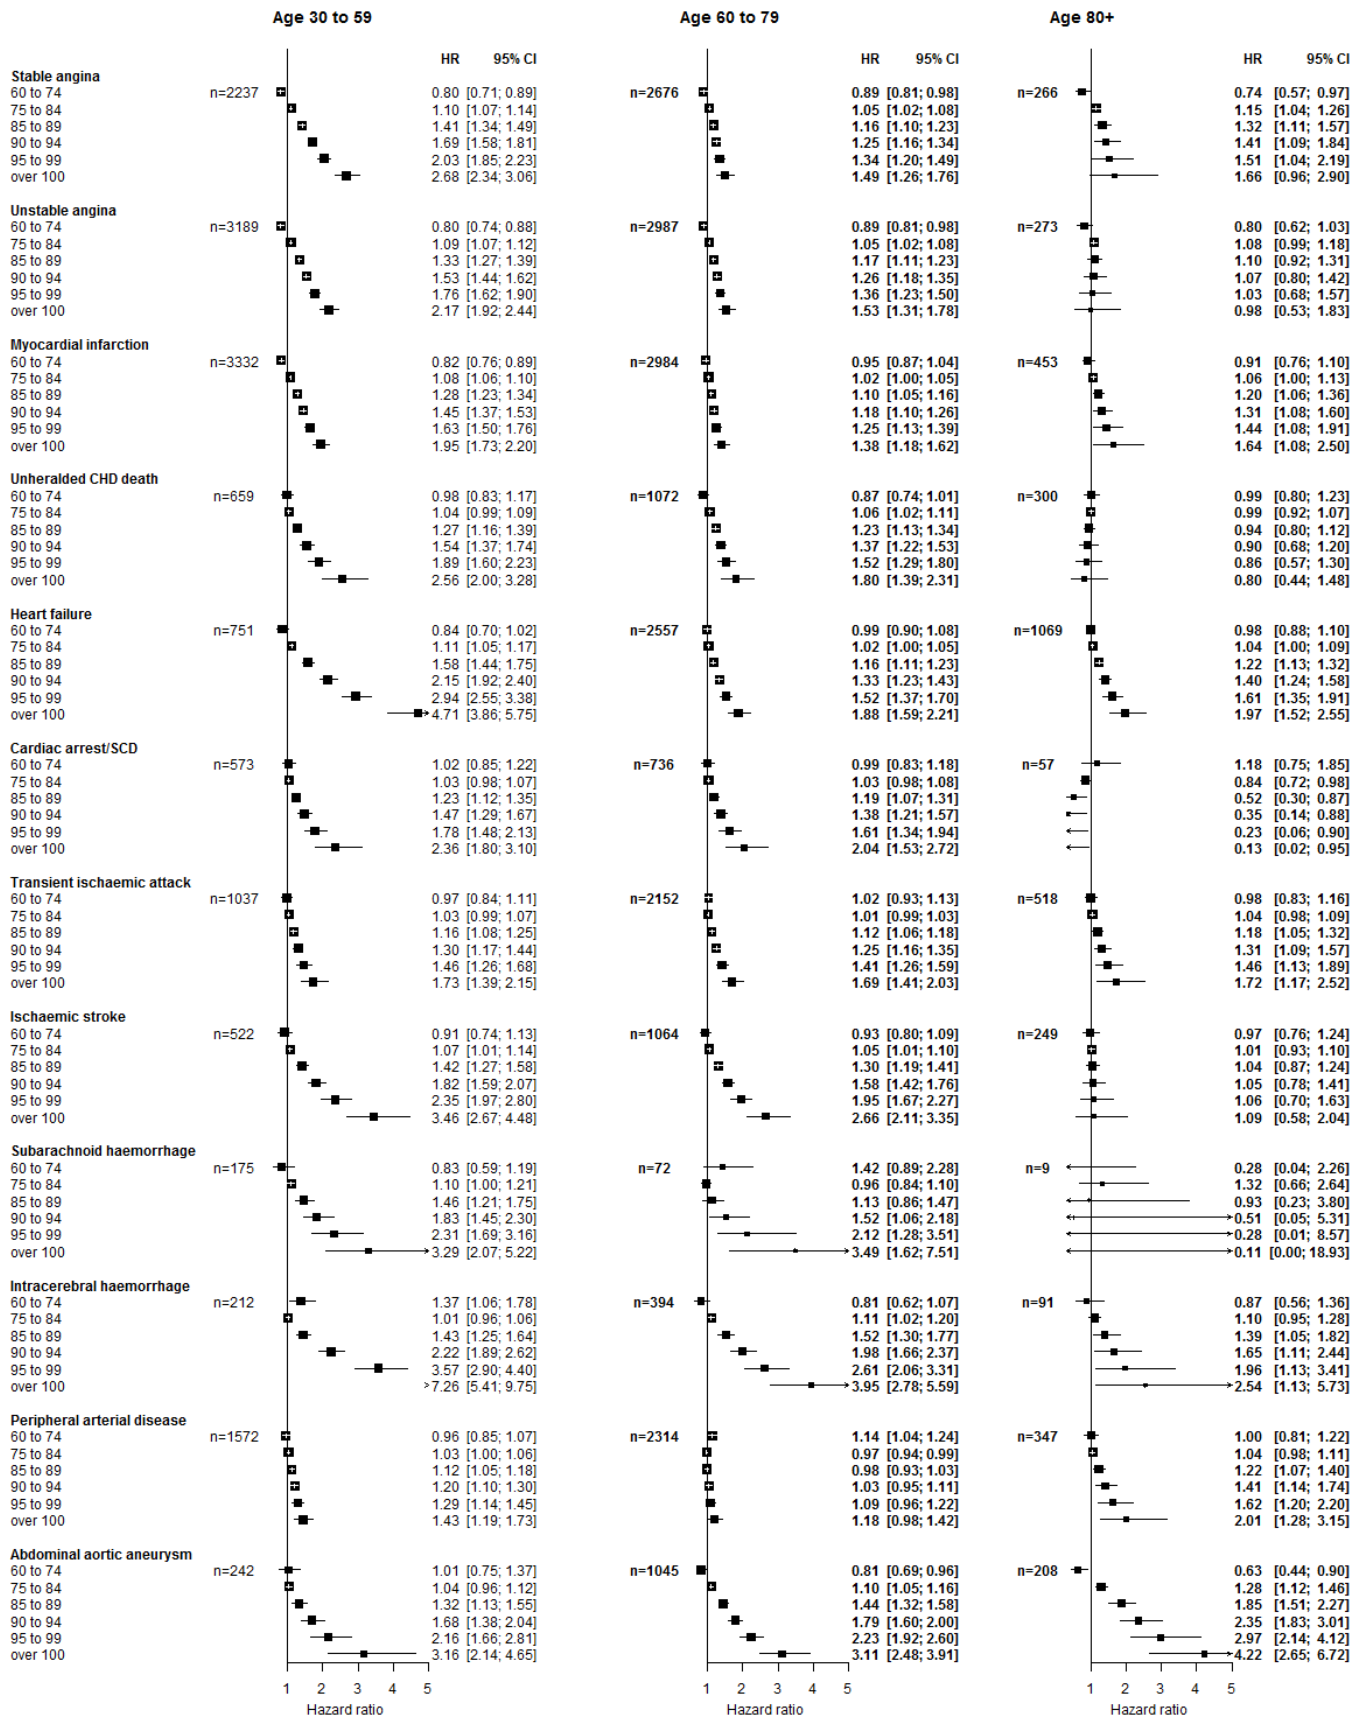

**Figure S 10 Hazard ratios (95% CIs) for the associations of different cutoffs of systolic blood pressure (reference 115 mmHg) with cardiovascular endpoints in women adjusted for age (BP was modelled as a continuous variable using splines with 3 knots).**

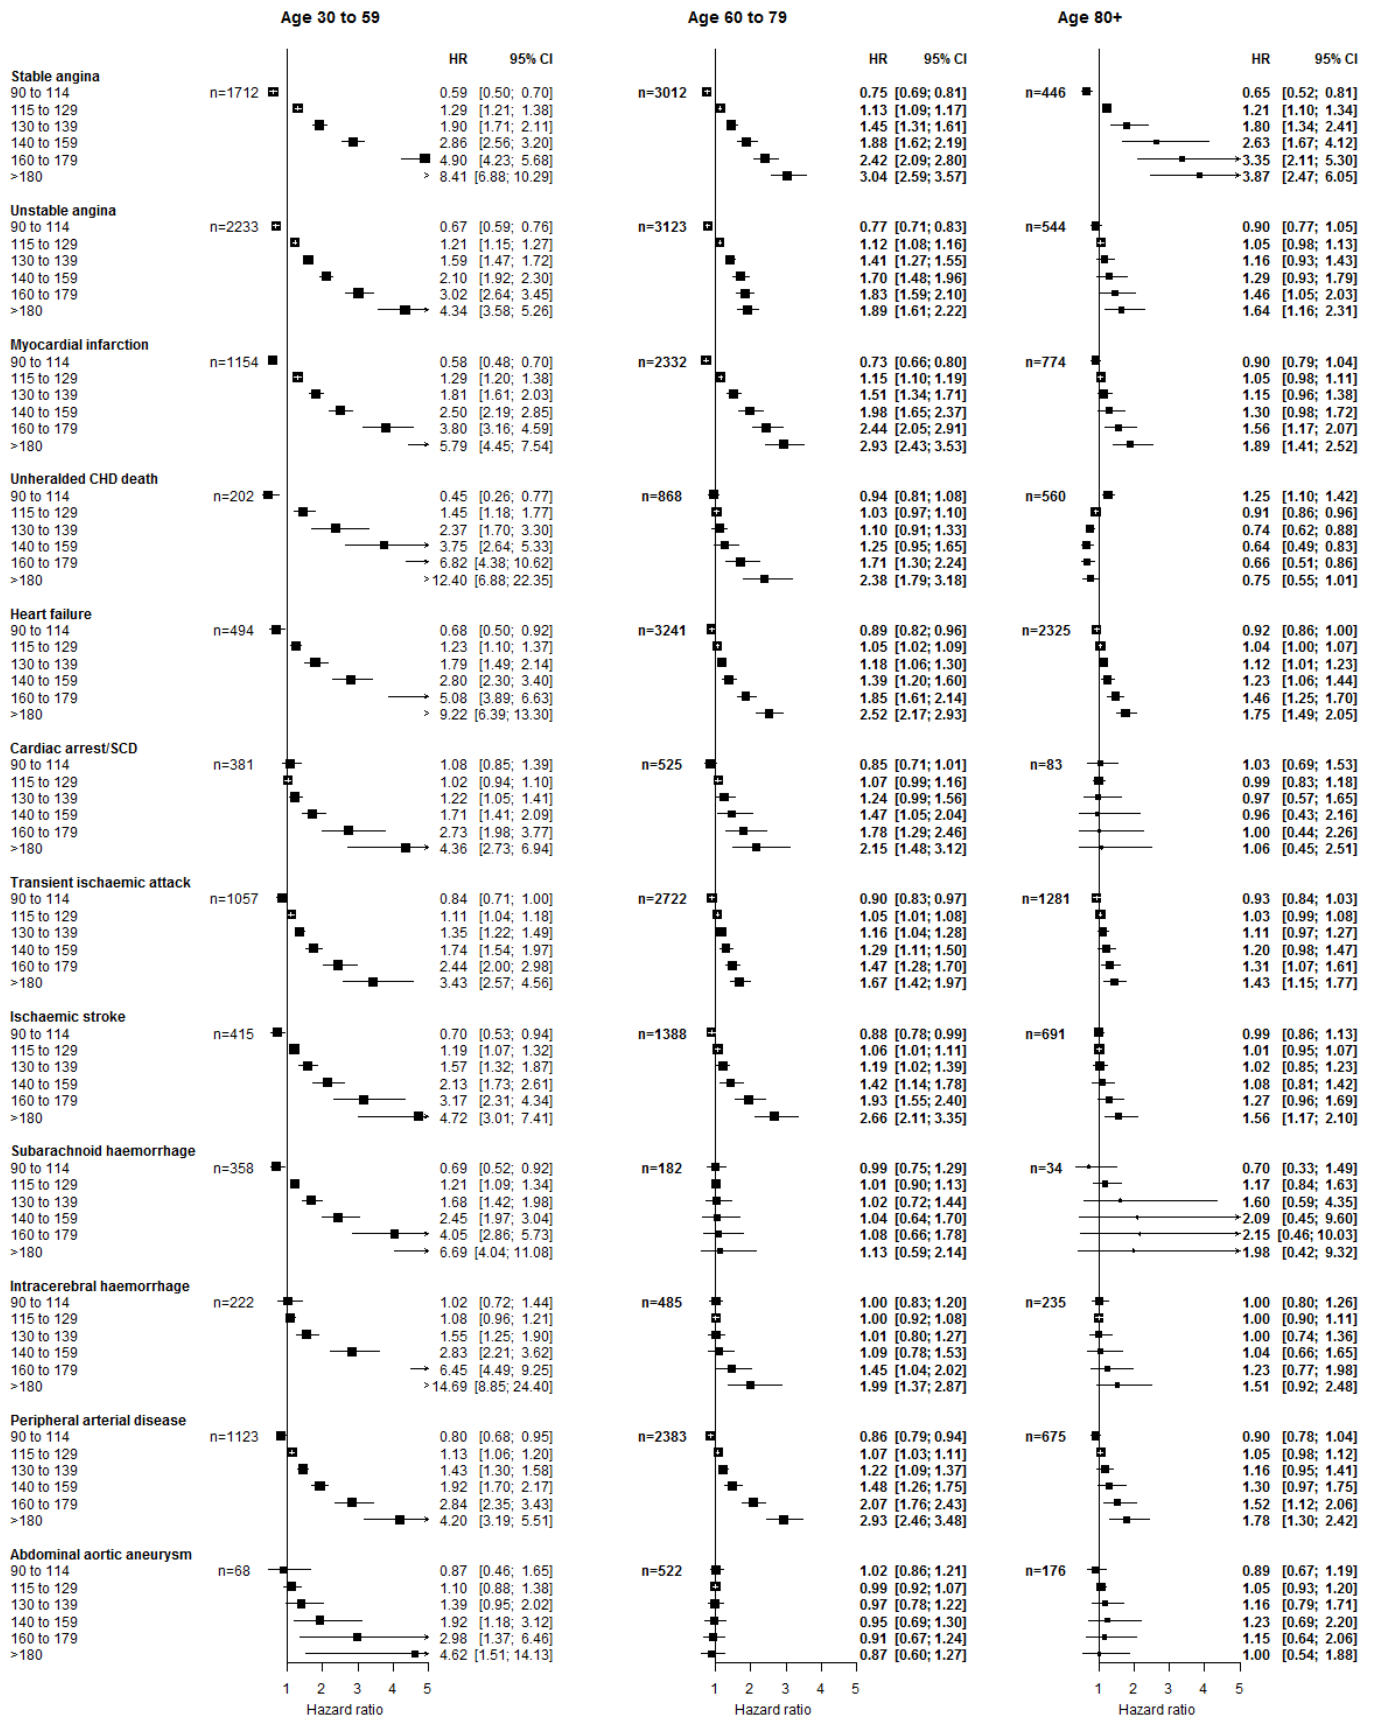

**Figure S 11 Hazard ratios (95% CIs) for the associations of different cutoffs of diastolic blood pressure (reference 75 mmHg) with cardiovascular endpoints in women adjusted for age (BP was modelled as a continuous variable using splines with 3 knots).**

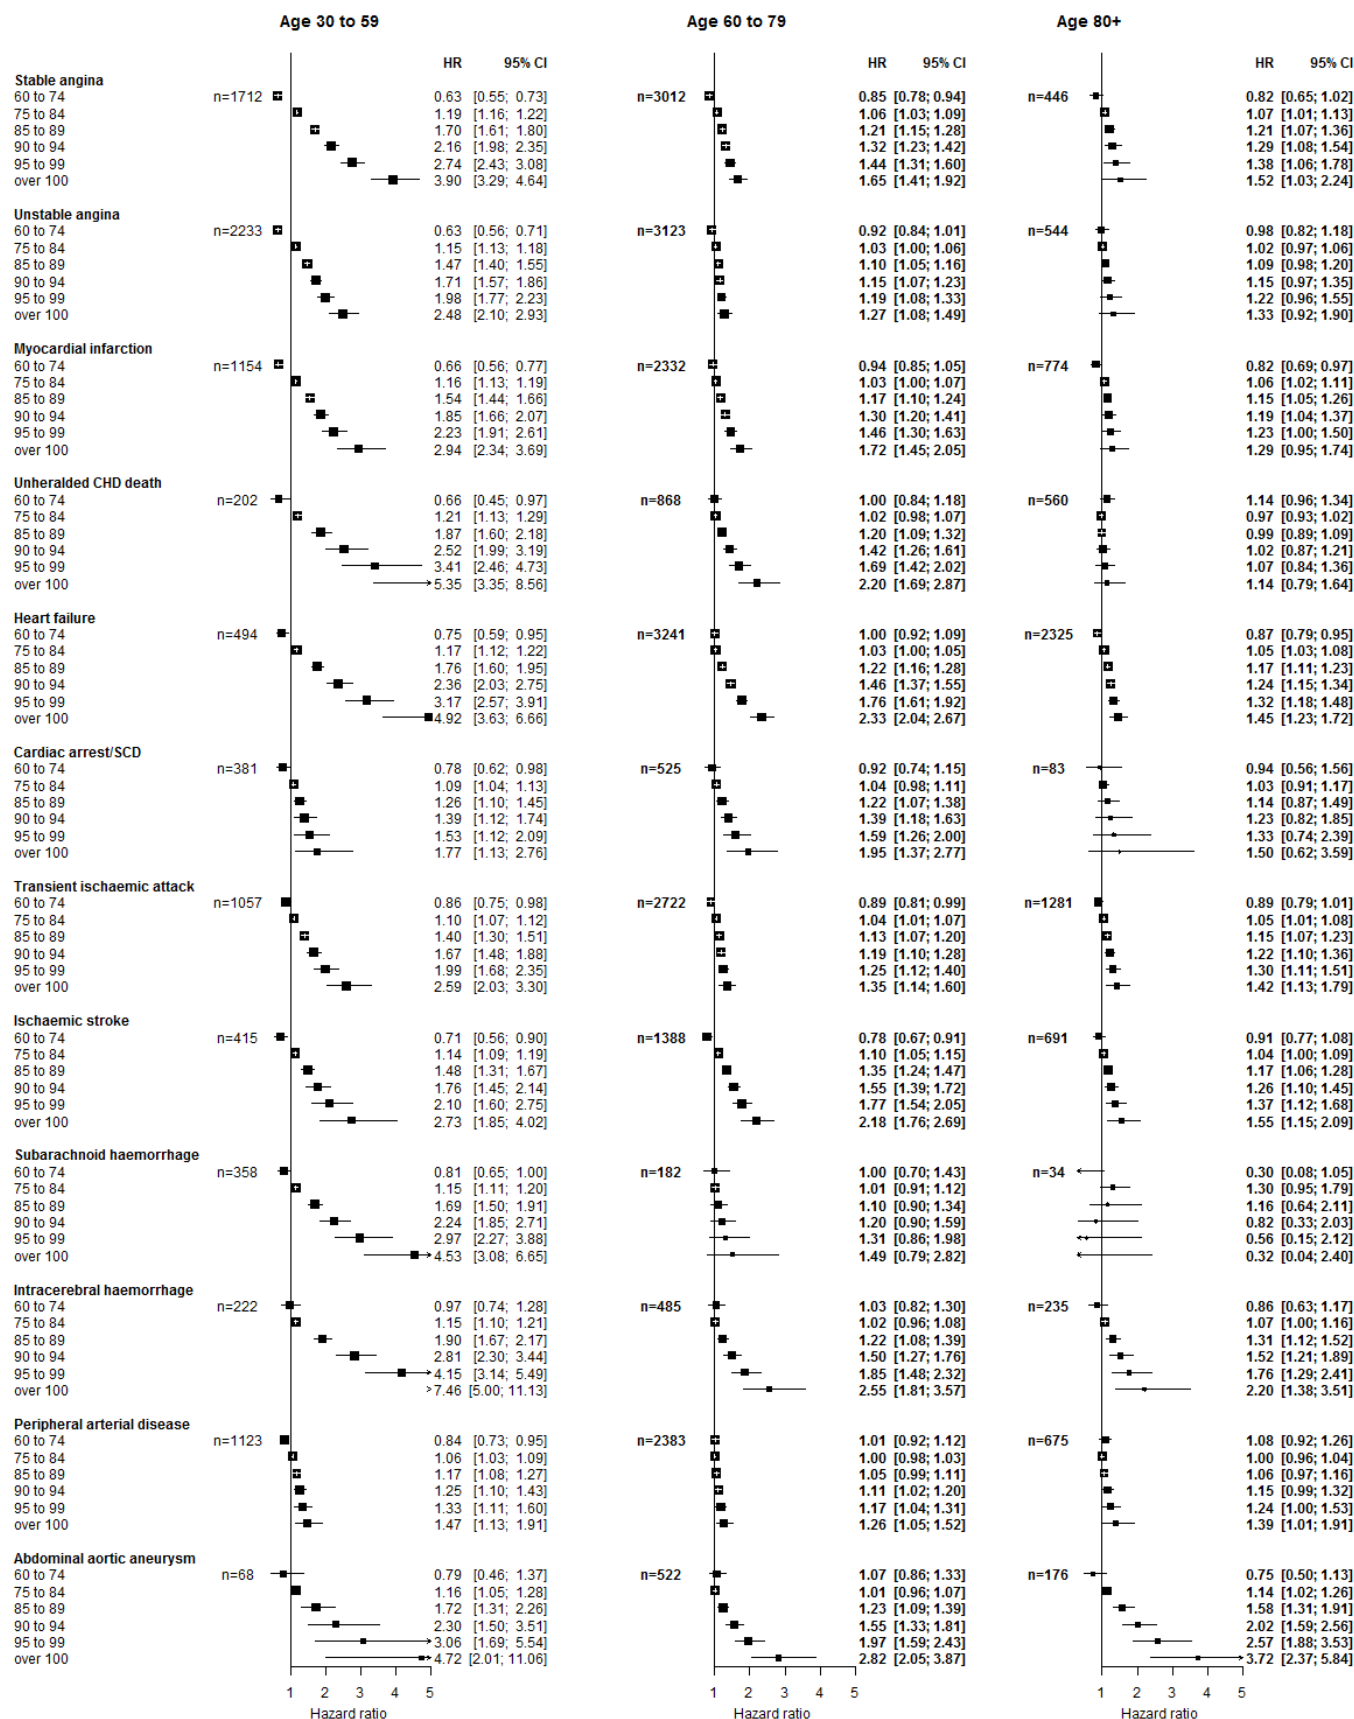

**Figure S 12 Hazard ratios (95% CIs) for the associations of different cutoffs of systolic blood pressure (reference 115 mmHg) with cardiovascular endpoints in people not receiving blood pressure medications at baseline adjusted for age (BP was modelled as a continuous variable using splines with 3 knots).**

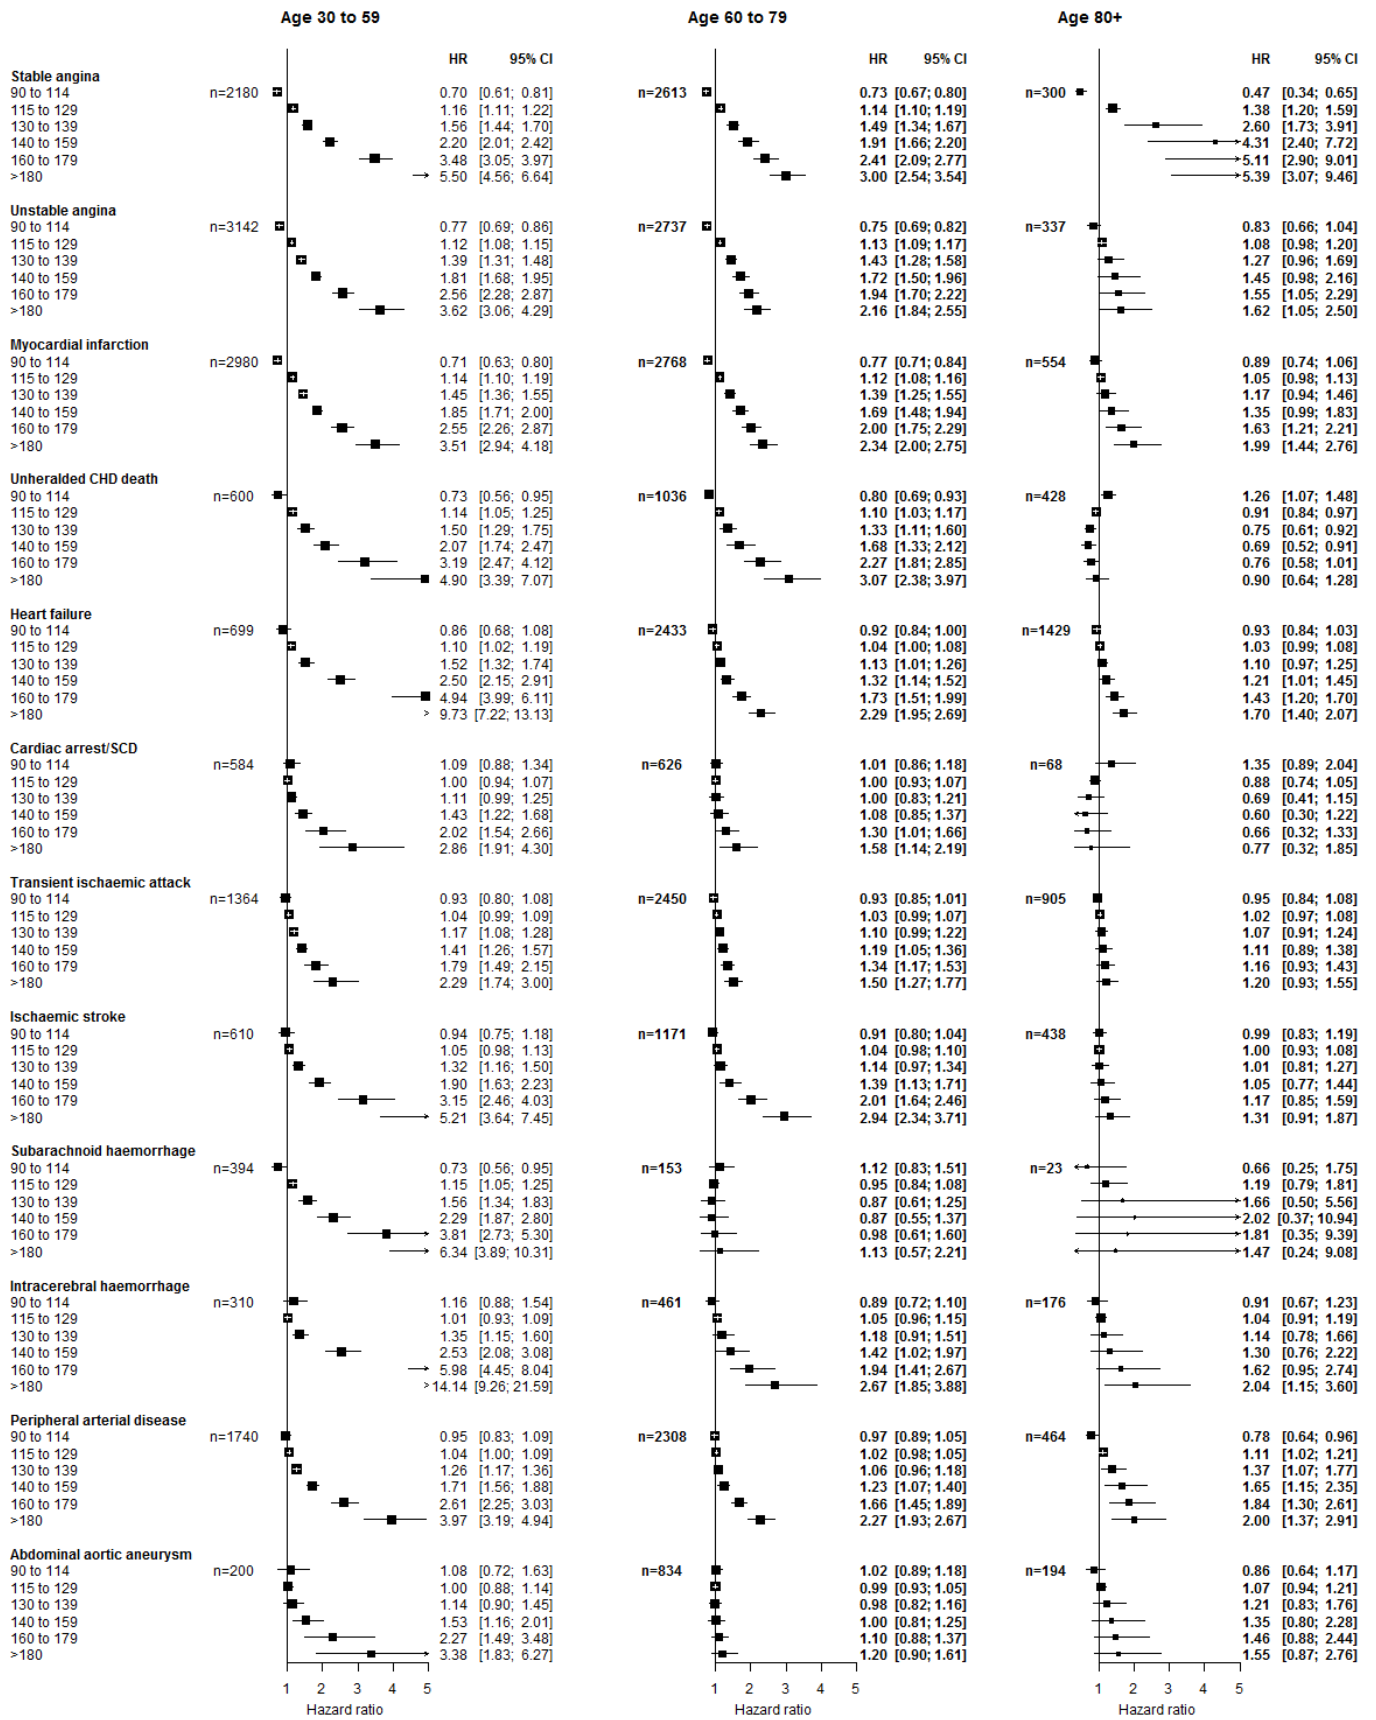

**Figure S 13 Hazard ratios (95% CIs) for the associations of different cutoffs of diastolic blood pressure (reference 75 mmHg) with cardiovascular endpoints in people not receiving blood pressure medications at baseline adjusted for age (BP was modelled as a continuous variable using splines with 3 knots).**

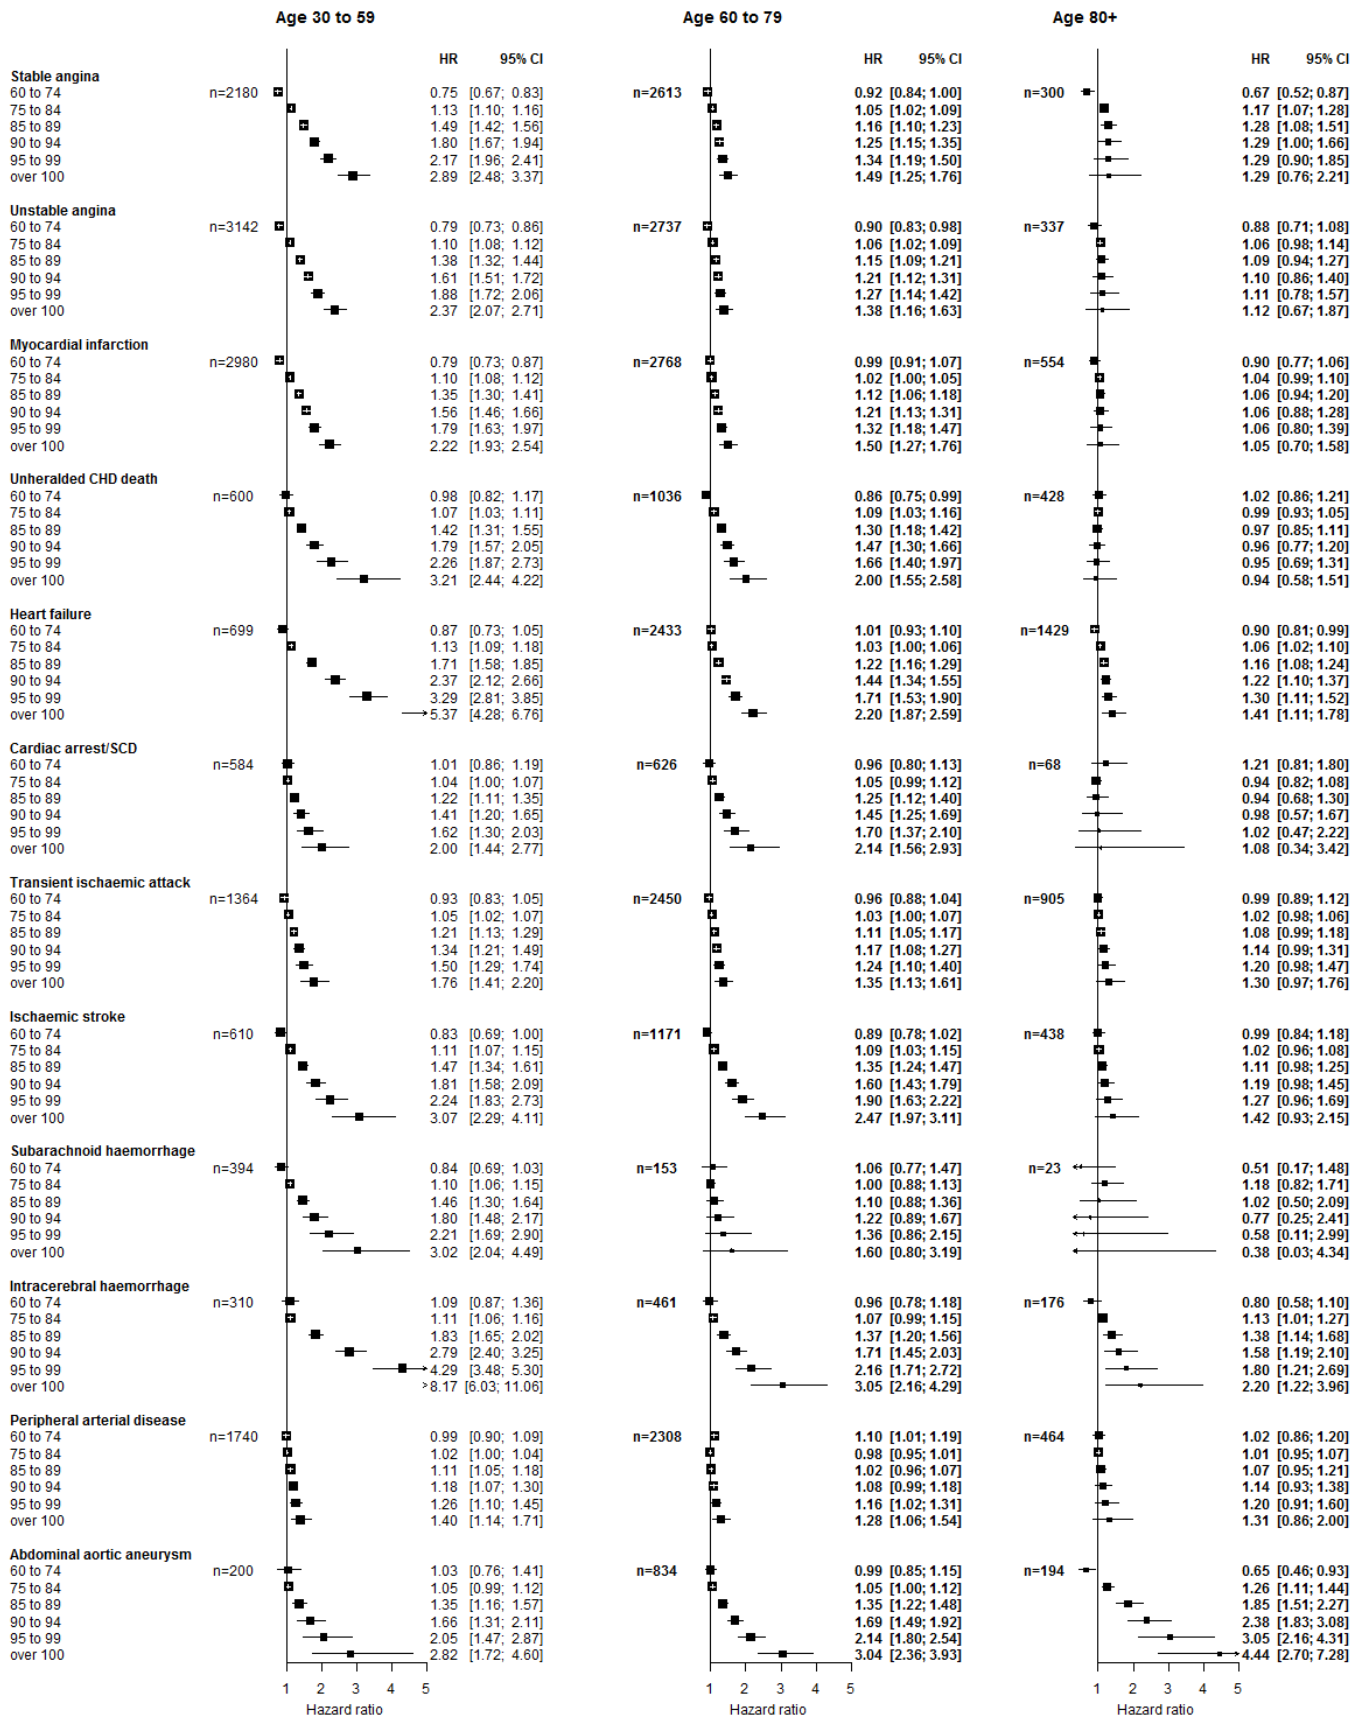

**Figure S 14 Hazard ratios (95% CIs) for the associations of different cutoffs of diastolic blood pressure (reference 75 mmHg) with cardiovascular endpoints in people receiving blood pressure medications at baseline adjusted for age (BP was modelled as a continuous variable using splines with 3 knots).**

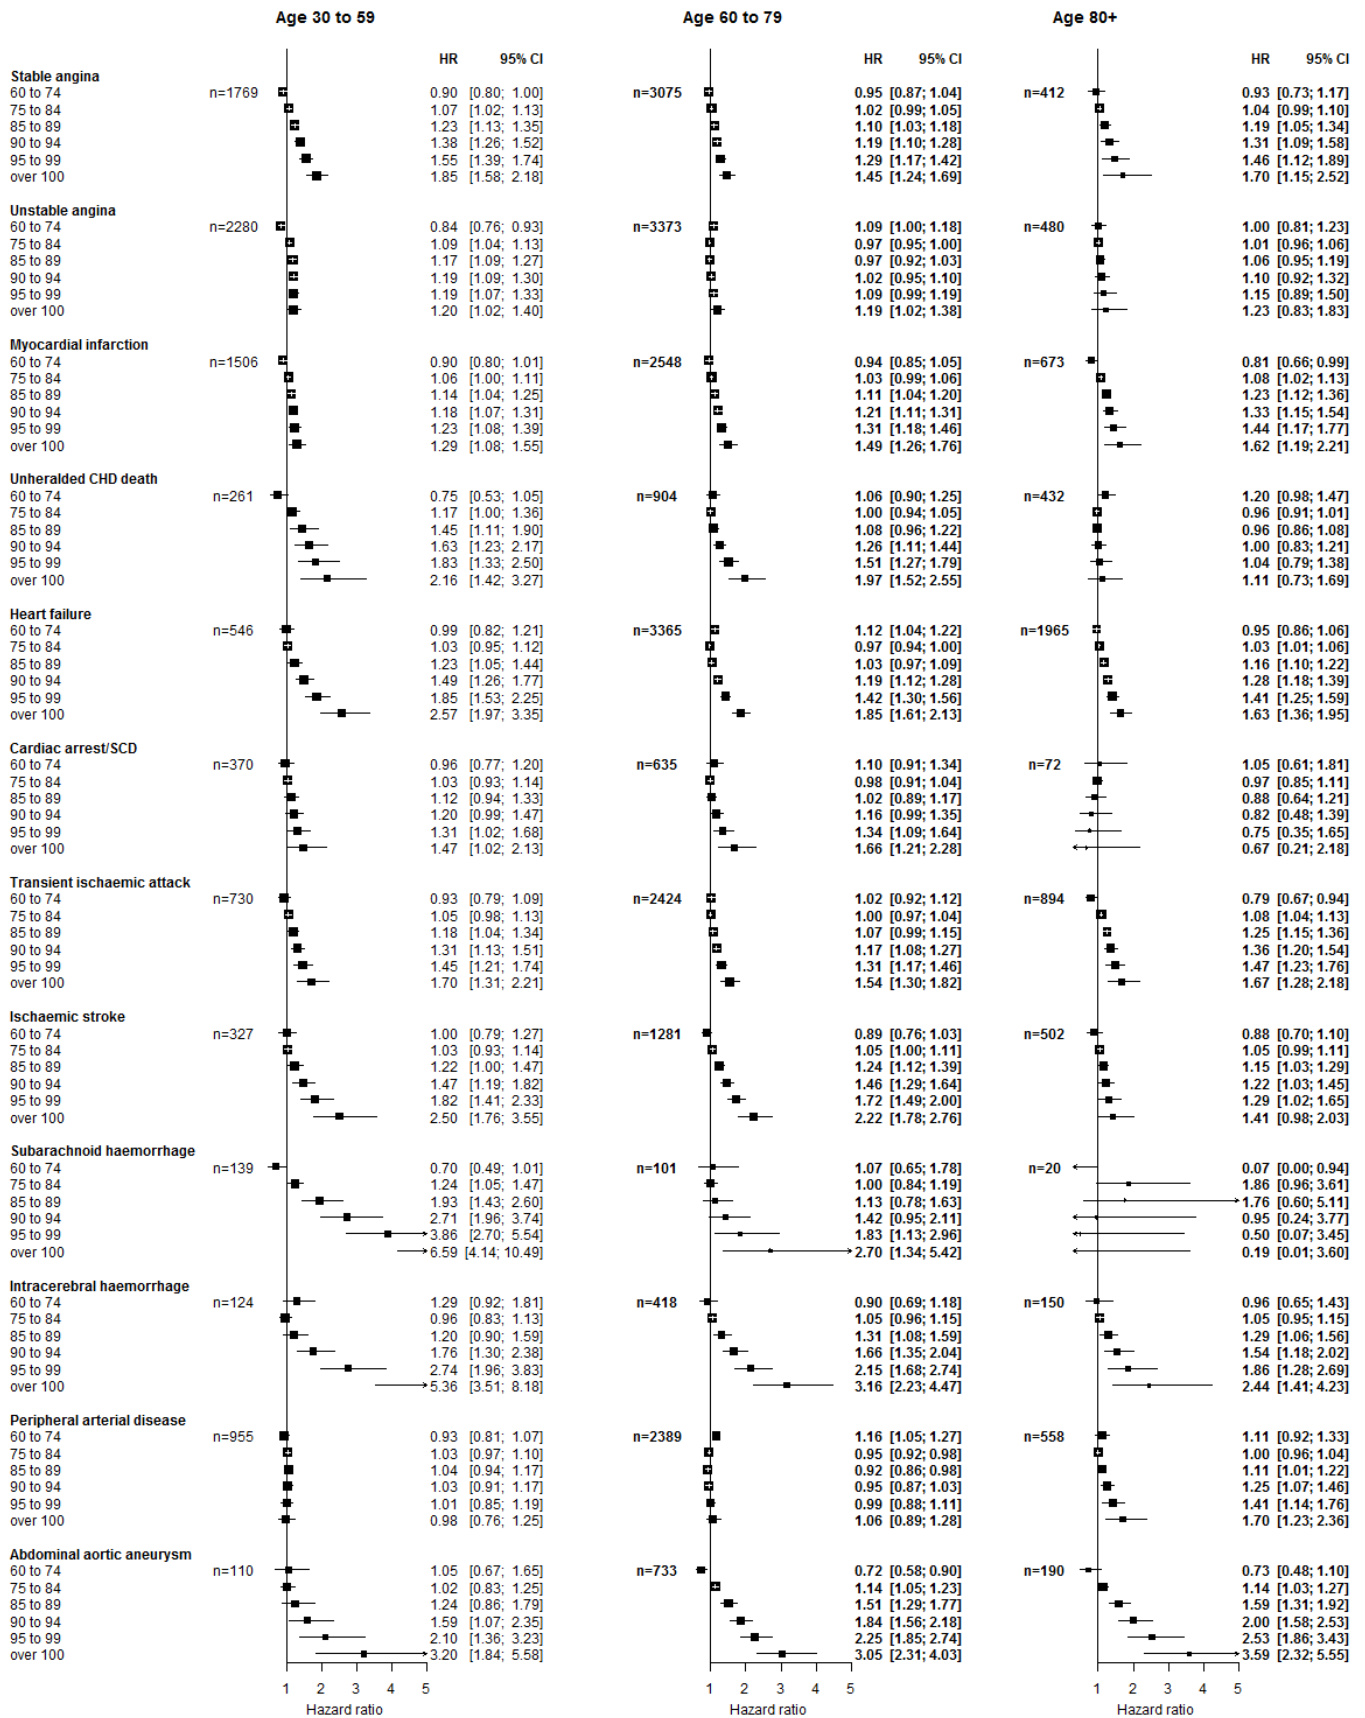

**Figure S 15 Hazard ratios (95% CIs) for the associations of different cutoffs of systolic blood pressure (reference 115 mmHg) with cardiovascular endpoints in people receiving blood pressure medications at baseline adjusted for age (BP was modelled as a continuous variable using splines with 3 knots).**

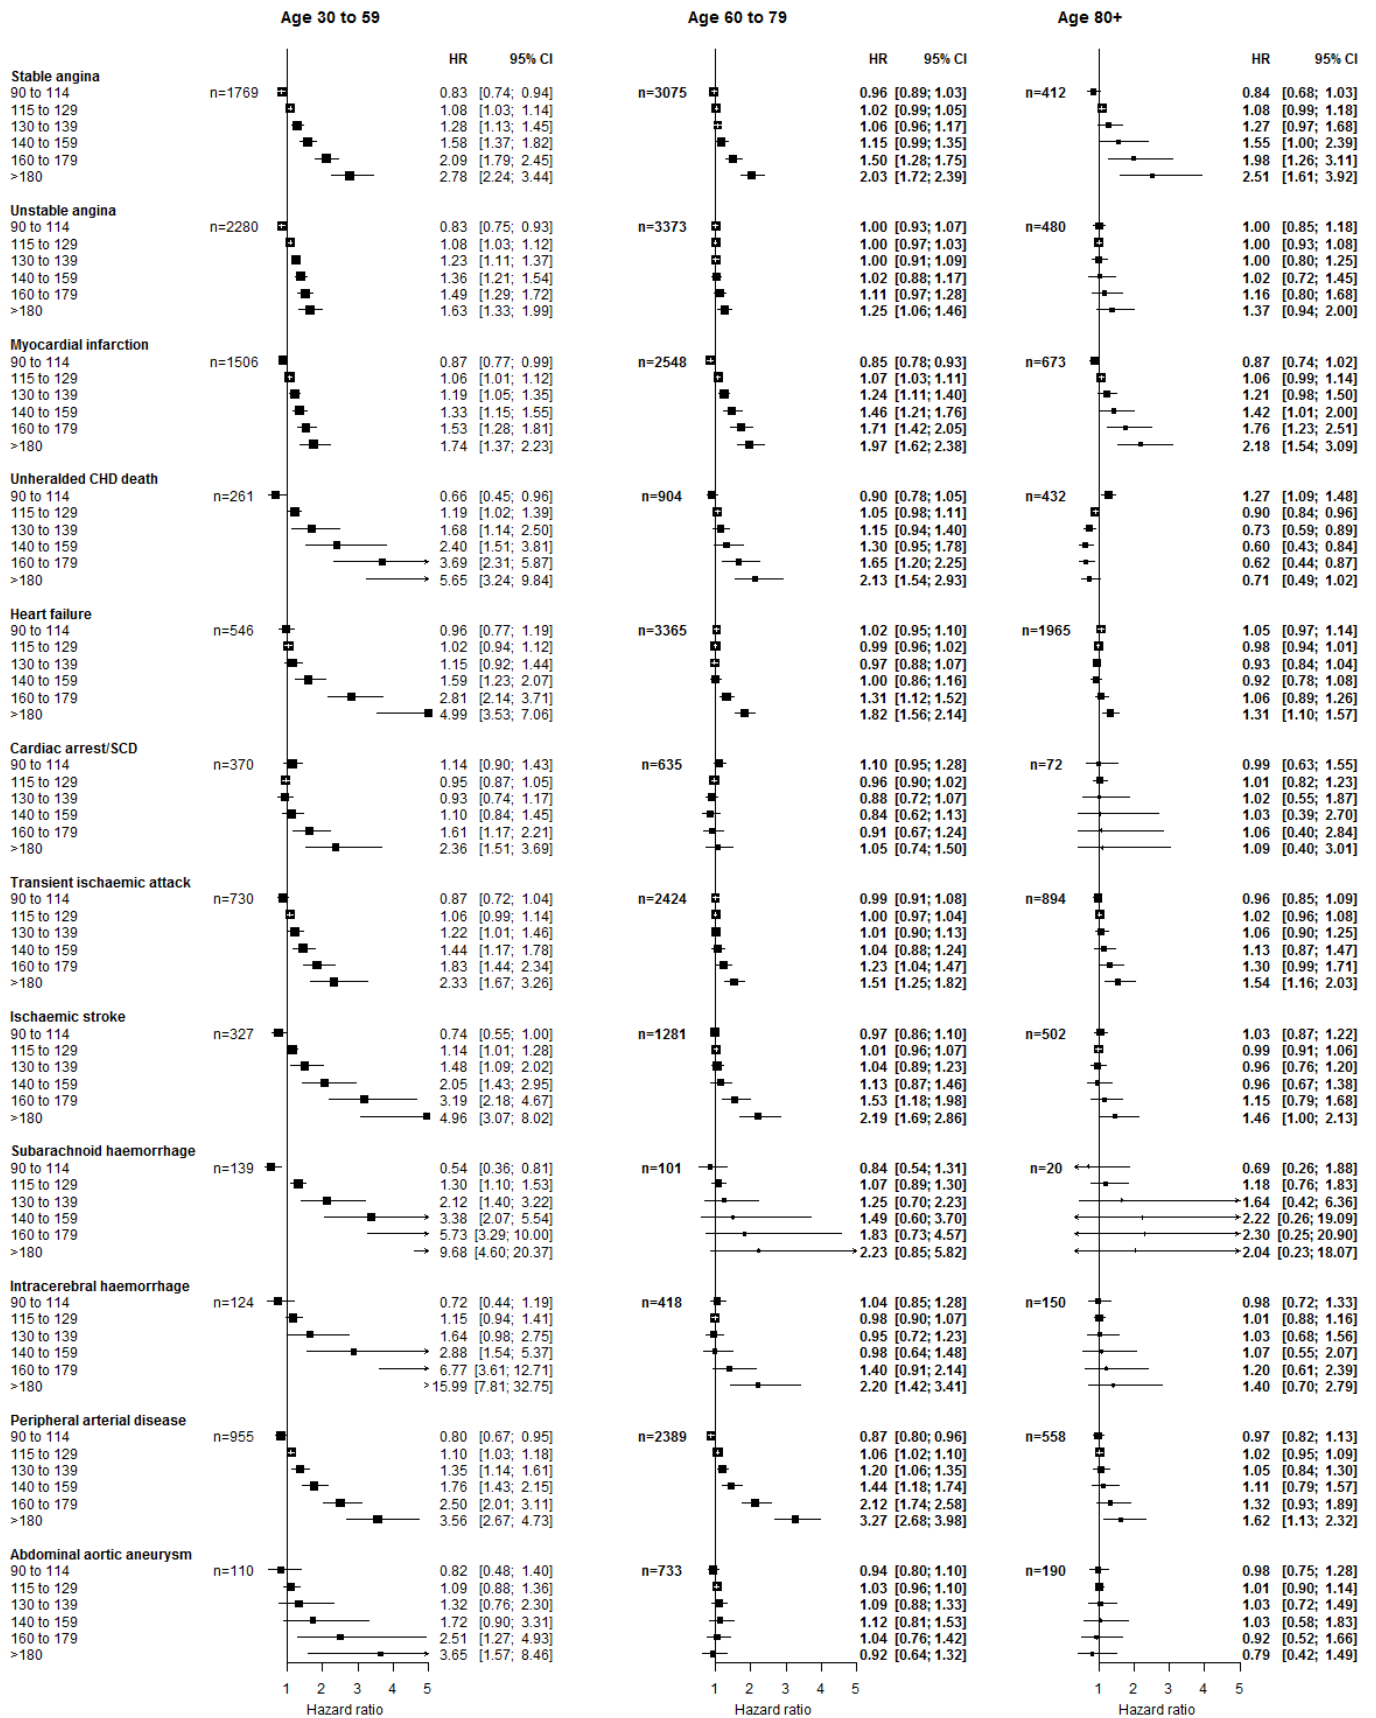



**Figure S 16 Lifetime risk of 12 different cardiovascular diseases in men and women with normal blood pressure or hypertension\* at index age 30.**

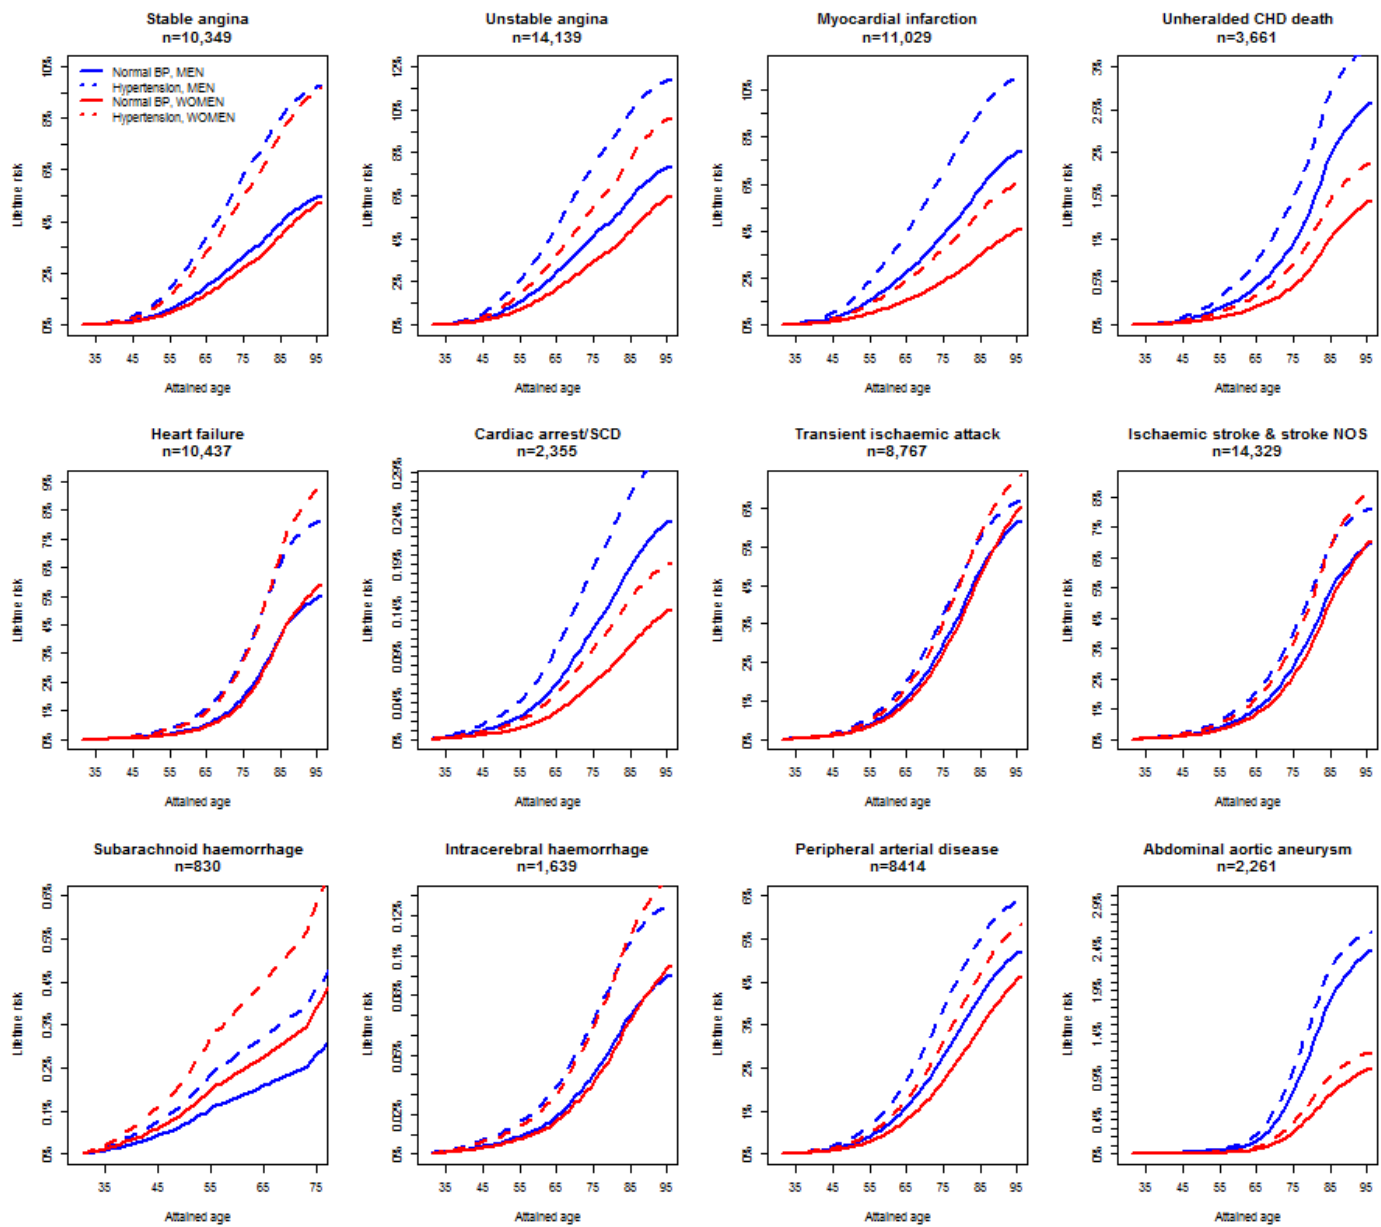

\*hypertension defined as systolic blood pressure  $\geq 140$  or diastolic blood pressure  $\geq 90$  mmHg or use of blood pressure lowering treatments or physician-recorded diagnosis at baseline.

**Figure S 17 Years of life lost to cardiovascular disease up to age 95 years in men and women associated with hypertension at index age 30, 60 and 80, adjusted for sex, smoking, diabetes, and total and HDL cholesterol.**

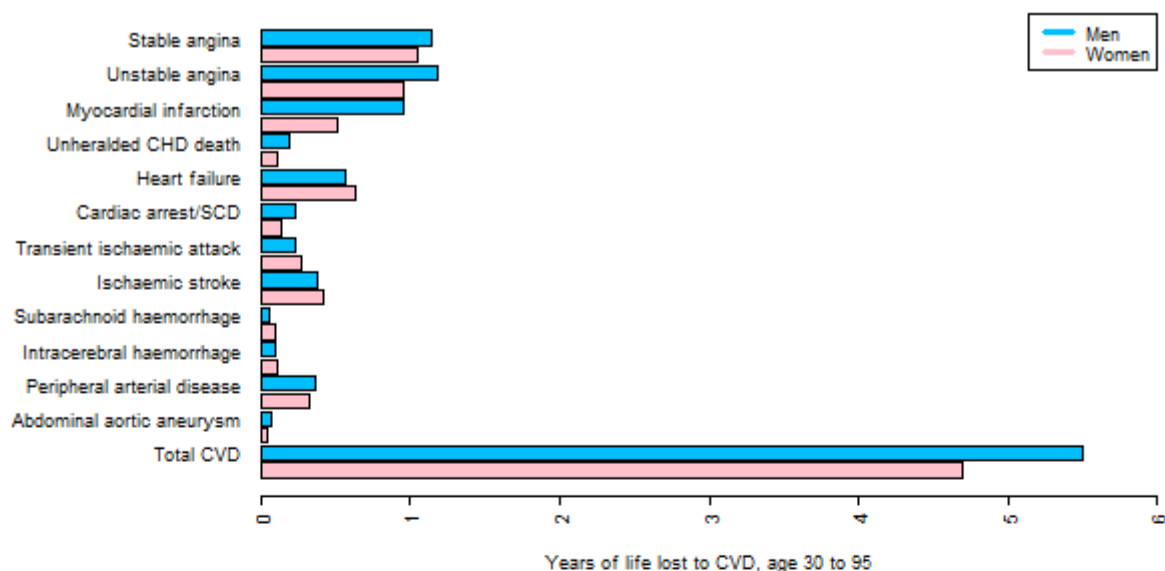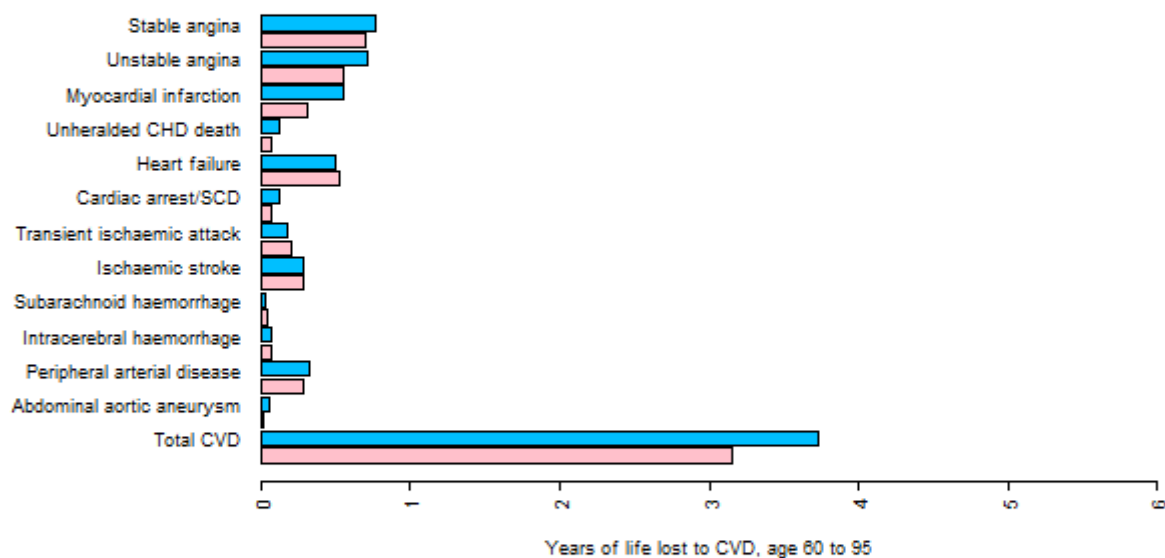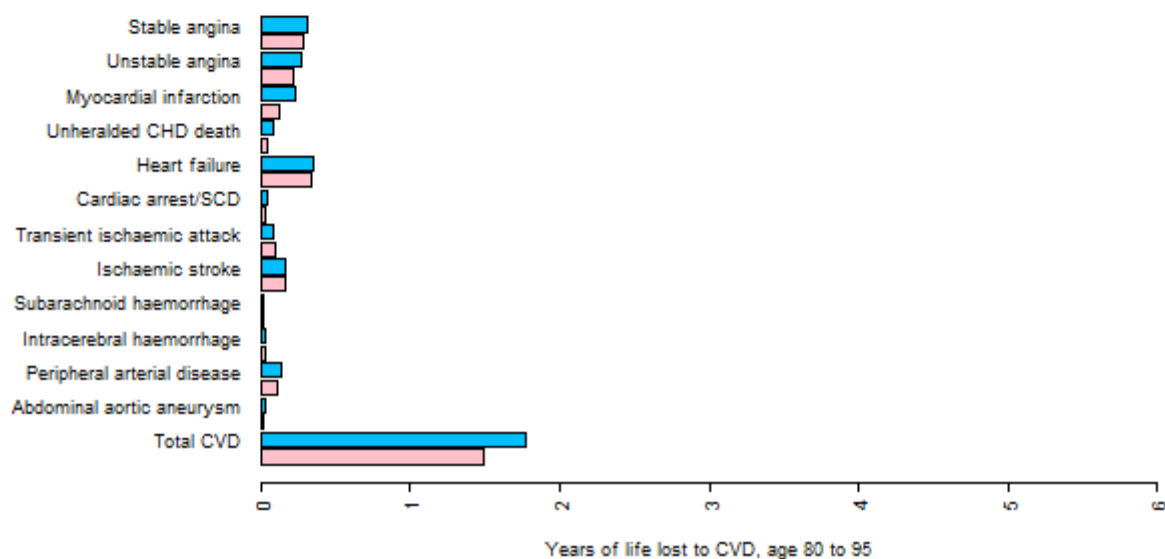

## Results from sensitivity analyses

**Figure S 18 Evaluation of heterogeneity\* at practice level of the associations of different cardiovascular outcomes with 20/10 mmHg increase in systolic/diastolic blood pressure.**

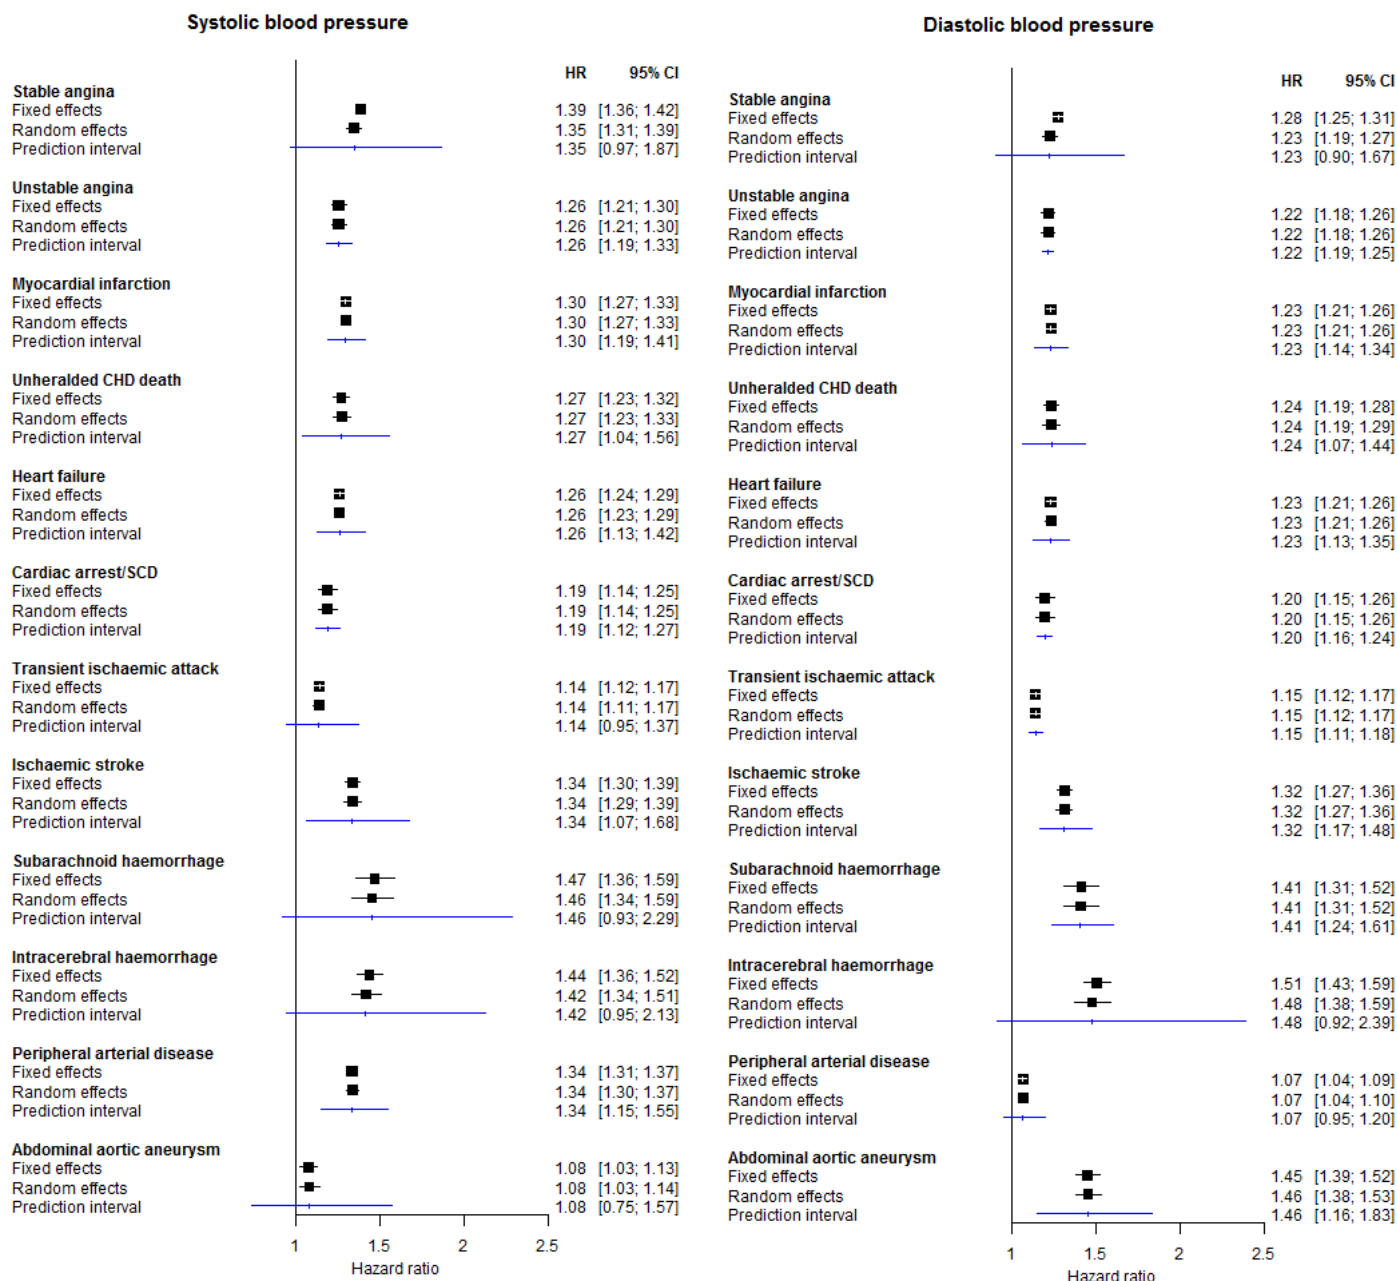

\*Estimates of fixed effects are equivalent to those reported in the main analysis (but differ slightly because unlike in the main analysis were practices with at least 1 event contributed to the estimates, here we have considered studies with 2 or more for modelling purposes). Estimates of random effects account for practice level heterogeneity; differences between fixed effects and random effects signify that the heterogeneity impacts on the overall associations. The prediction interval expresses uncertainty about the association in a randomly chosen practice.<sup>1</sup>

**Figure S 19 Hazard ratios (95% CIs) per 20/10 mmHg higher systolic or diastolic blood pressure adjusted for age and sex, using end points from different sources.**

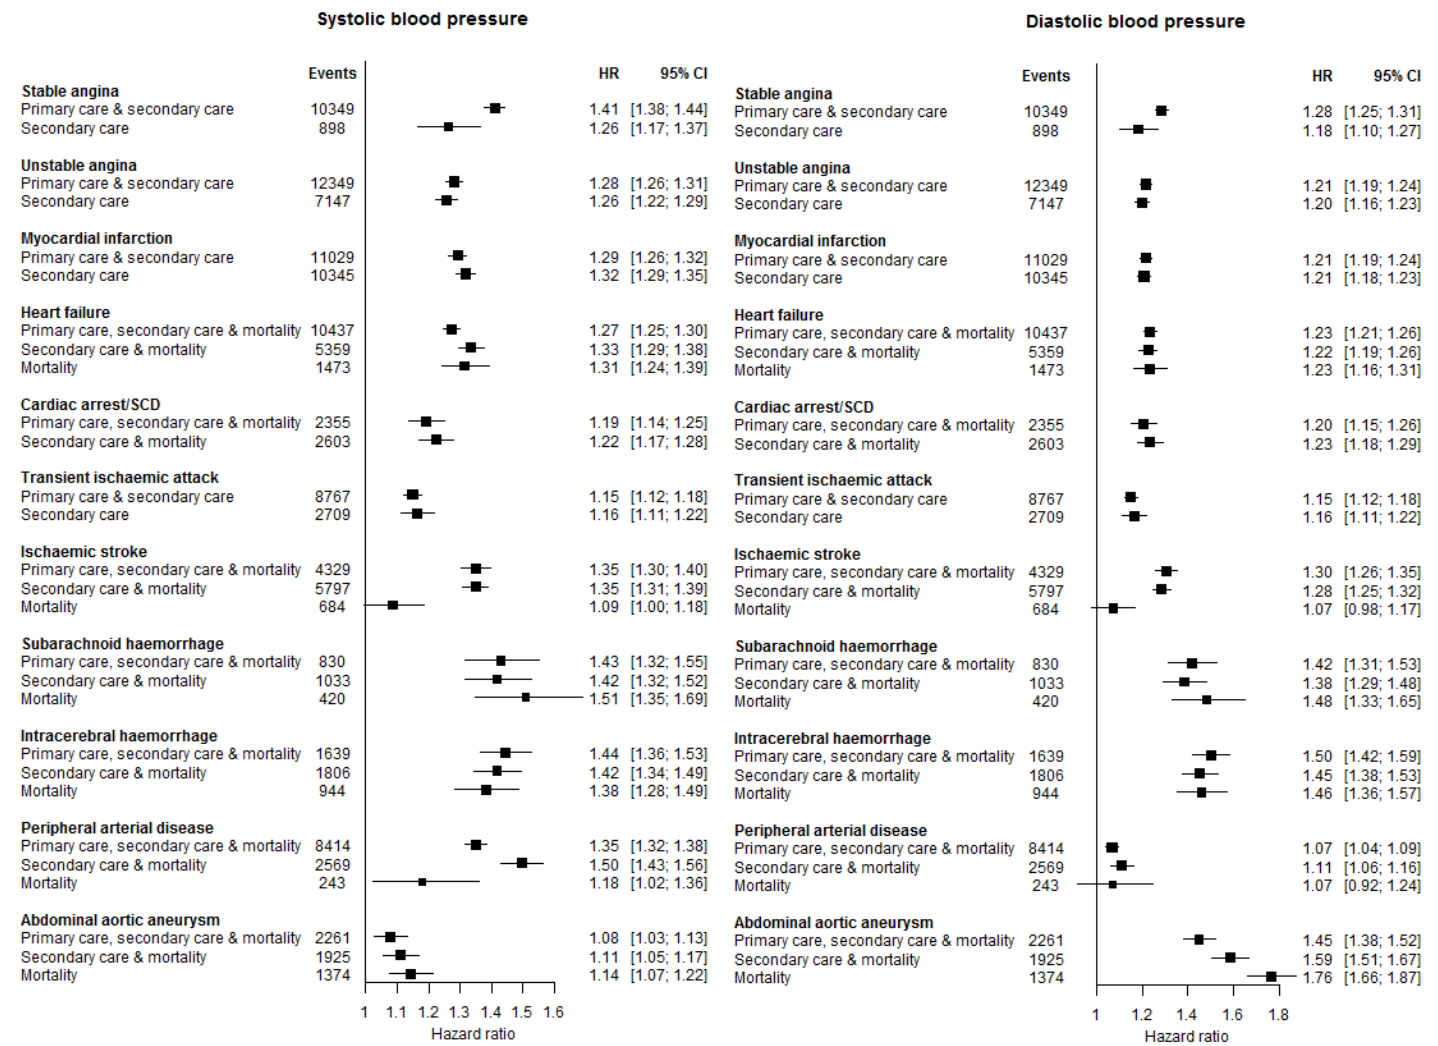

In the main analysis all 3 sources of end points are used (primary care, secondary care and death records). To compute endpoints based on secondary care and mortality (second row where applicable) patients were followed up until a hospital admission or death for the specified event, ignoring diagnoses/events recorded in primary care. Similarly, for mortality endpoints patients were followed up until death, ignoring non-fatal presentations. The majority of deaths from stroke are unclassified (not included in the mortality estimate from ischaemic stroke shown here).

Figure S 20 Age and sex adjusted hazard ratios (95% CIs) for 20 mmHg higher systolic blood pressure according to the number of BP measurements taken within 2 years of baseline (1 or more [as in the main analysis], only 1, or 2 or more).

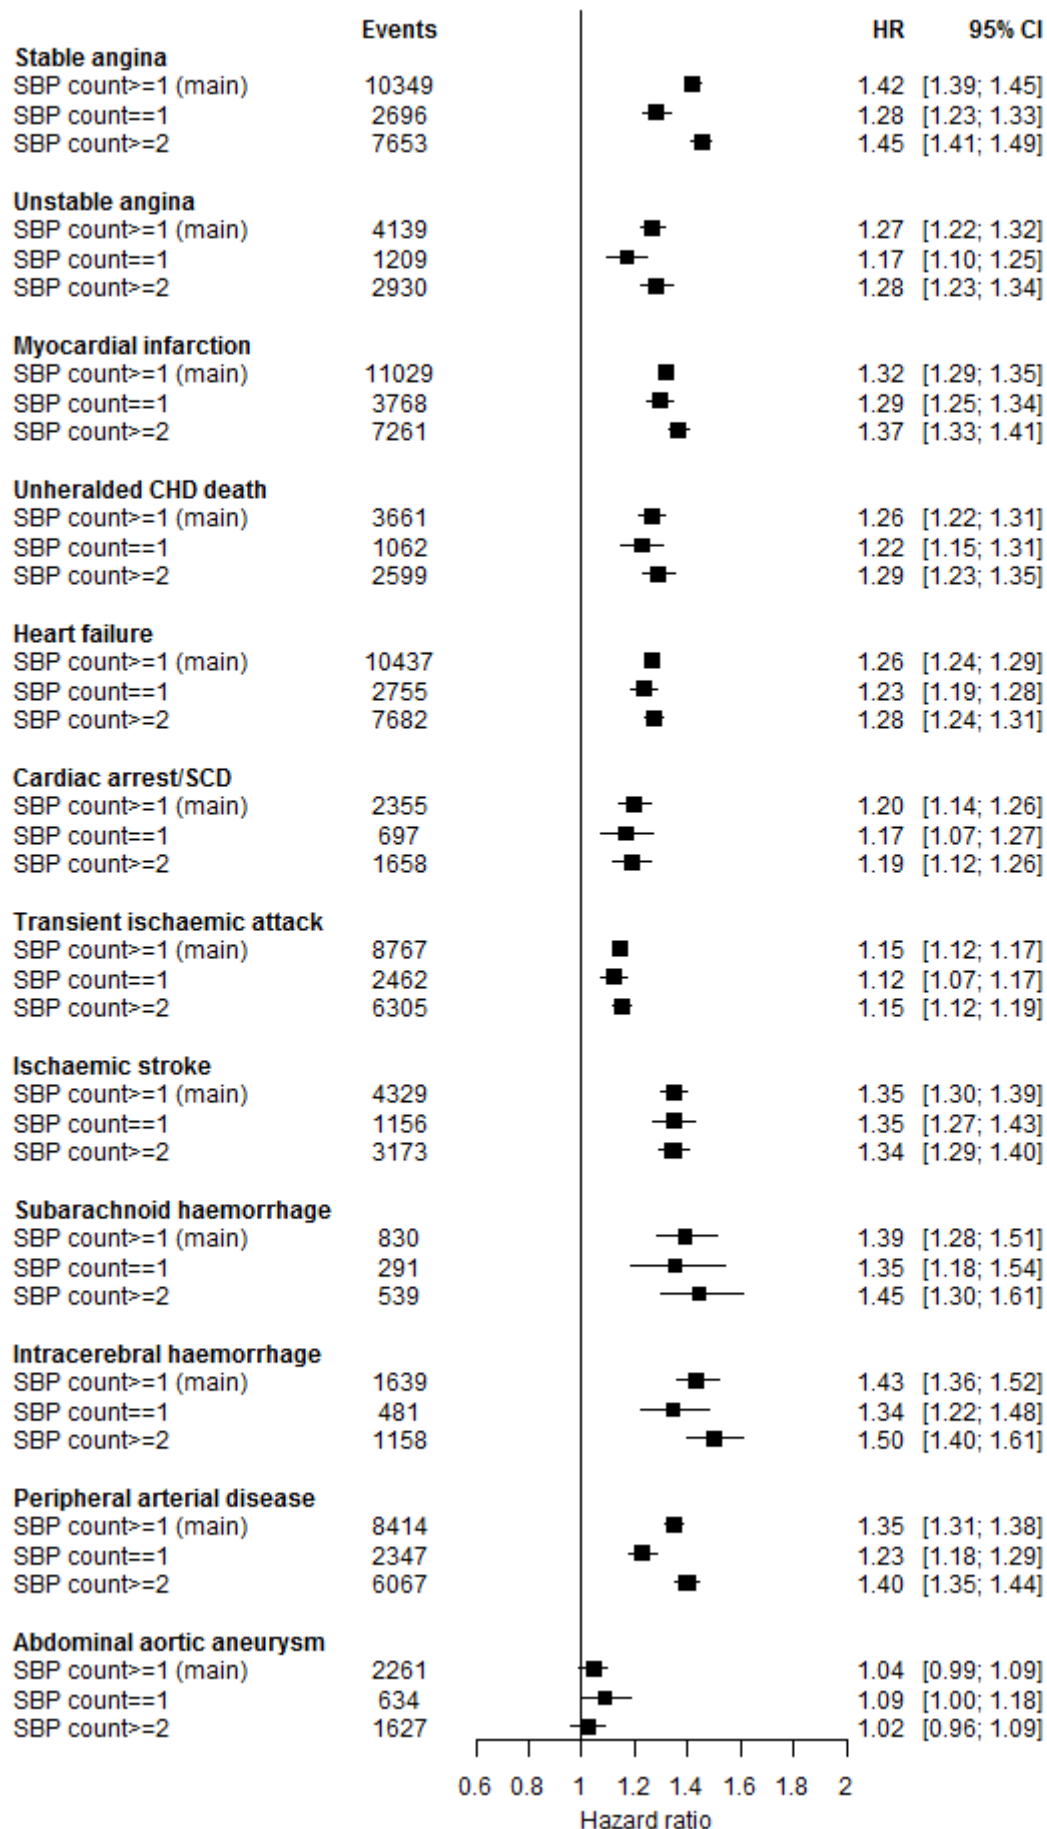

**Figure S 21** Age and sex adjusted hazard ratios (95% CIs) for 20 mmHg higher systolic blood pressure based on a single measurement closest to the baseline (within 2 years of baseline).

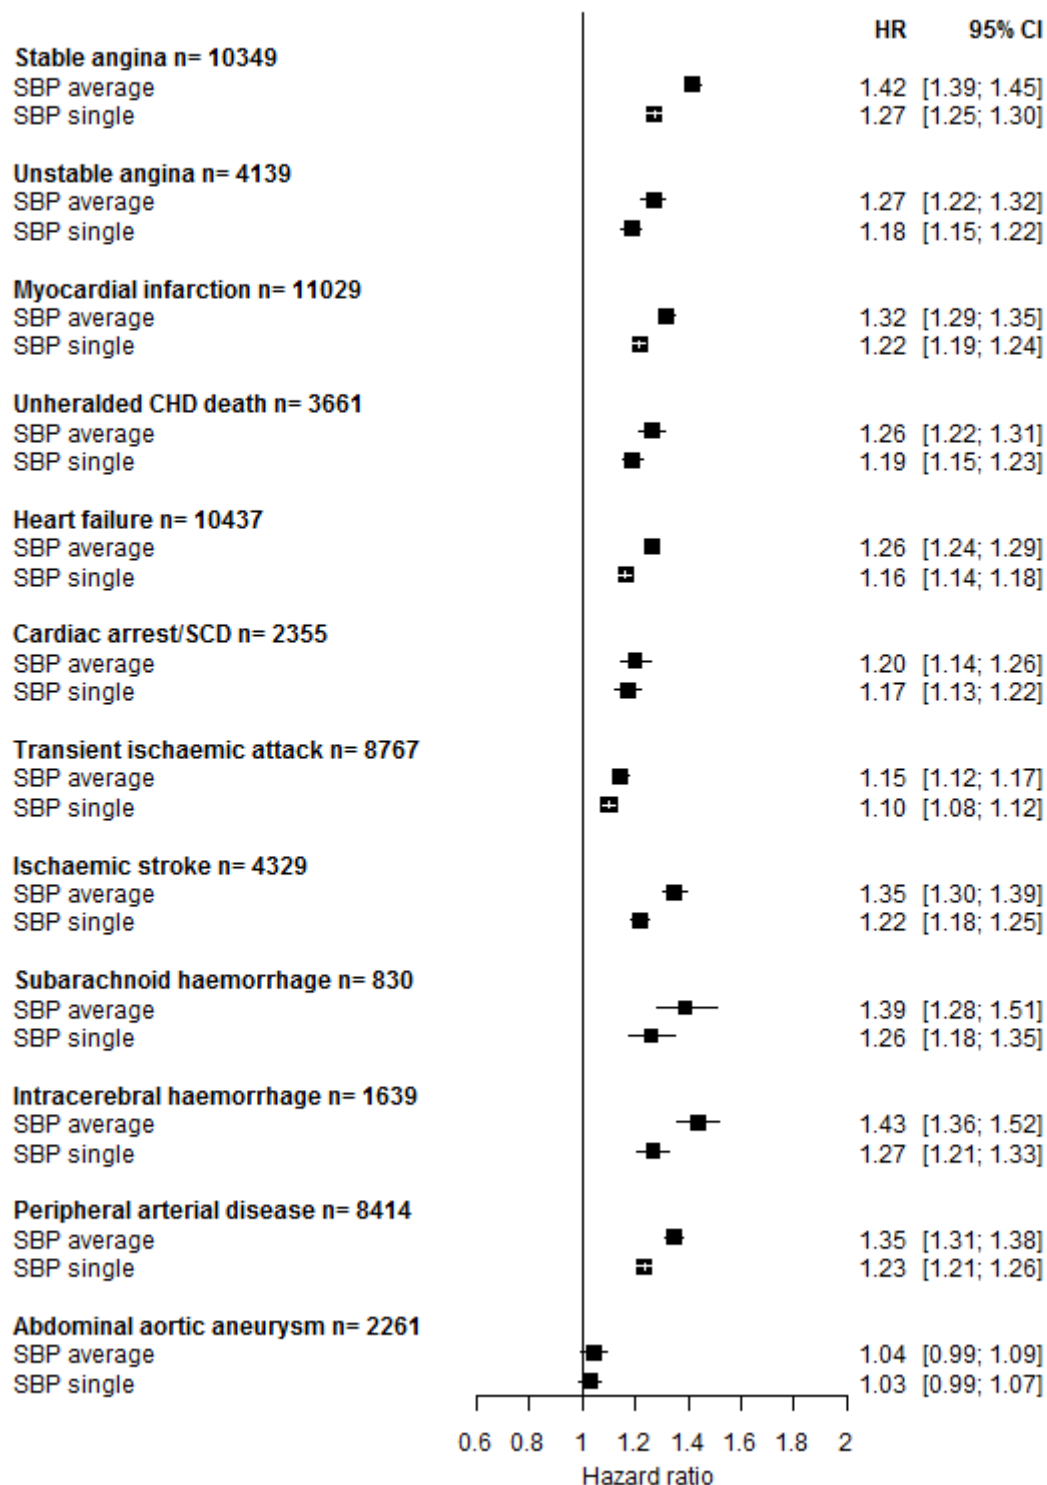

**Figure S 22 Age and sex adjusted hazard ratios (95% CIs) for 20 mmHg higher systolic blood pressure based on imputed and observed (main analysis) blood pressure levels.**

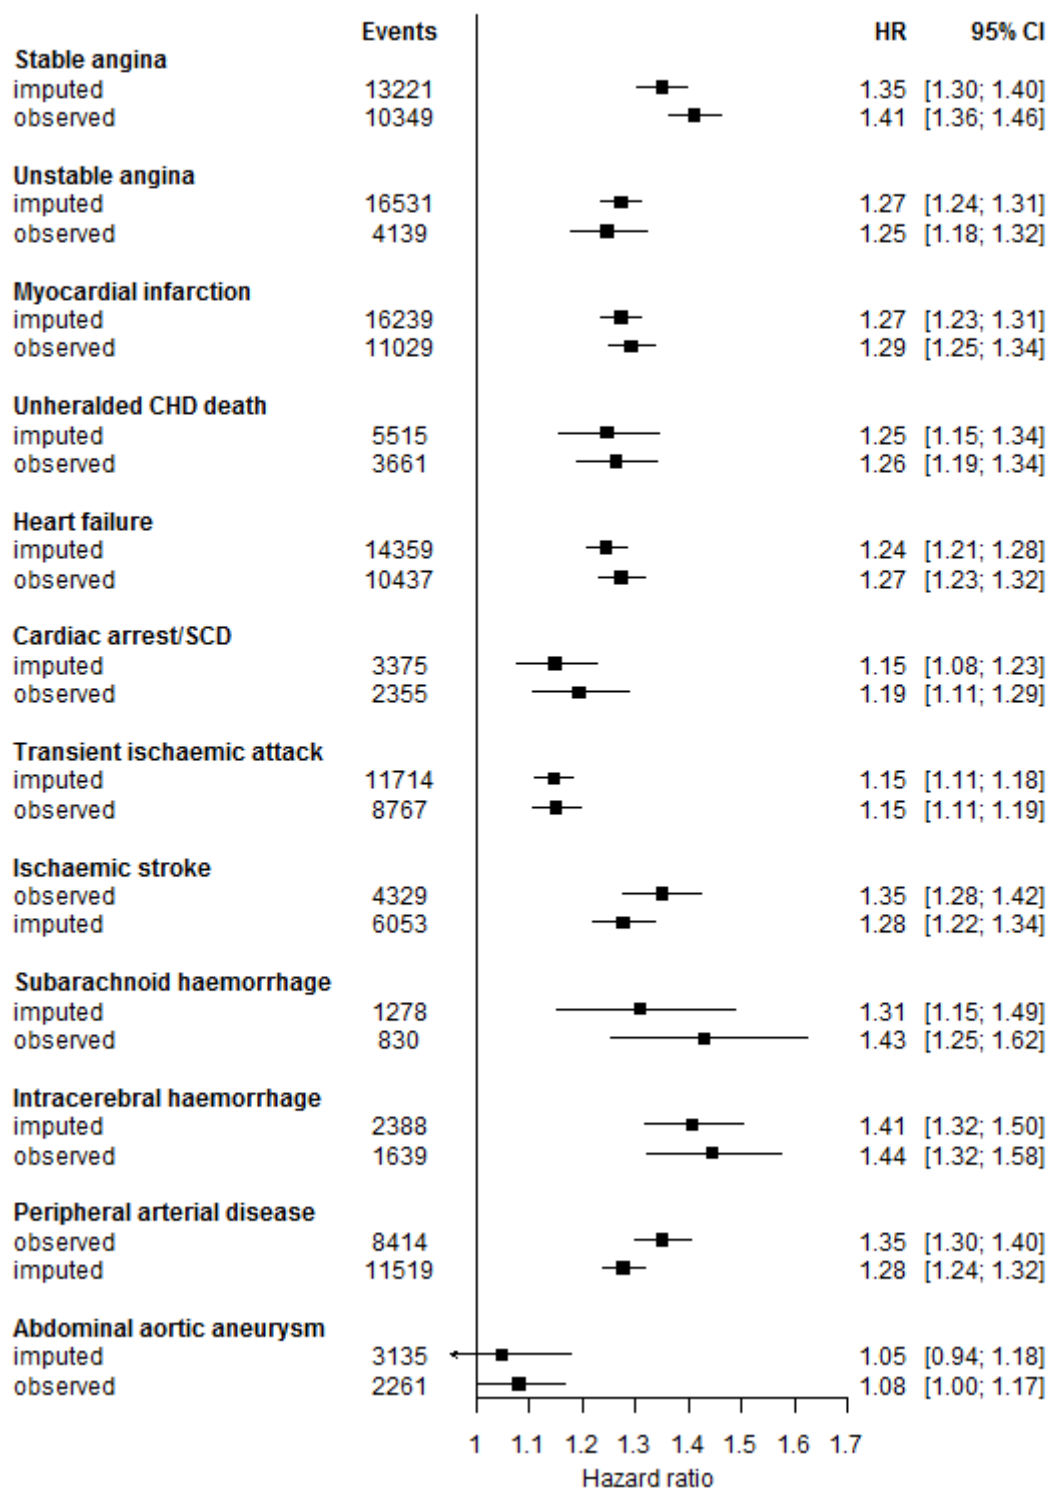

Dataset including observed and imputed BP, N= 1,937,360 patients; complete cases for SBP (as in main analysis) N= 1,258,006 patients.

## Supplementary methods

### Multiple imputation

## Supplementary methods

### Multiple imputation

Multiple imputation<sup>1</sup> was implemented using the *mice* algorithm in the statistical package R. Imputation models were estimated separately for men and women and included:

- a) all the baseline covariates used in the main analysis (age, quadratic age, diabetes, smoking, systolic blood pressure, diastolic blood pressure, mean arterial pressure, pulse pressure, total cholesterol, HDL cholesterol, body mass index),
- b) prior (between 1 and 4 years before study entry) and post (between 0 and 1 year after study entry) averages of continuous main analysis covariates and other measurements not in the main analysis (white cell count, haemoglobin, creatinine, alanine transferase),
- c) baseline medications (statins, blood pressure medications, aspirin, oral contraceptives and hormone replacement therapy),
- d) coexisting medical conditions (history of depression, cancer, renal disease, liver disease and chronic obstructive pulmonary disease),
- e) the Nelson-Aalen hazard and the event status for each endpoint analysed in the data<sup>2</sup>.

Non-normally distributed variables were log-transformed for imputation and exponentiated back to their original scale for analysis. Five multiply imputed datasets were generated, and Cox models fitted to each dataset. Coefficients were combined using Rubin's rules.

We checked whether the imputations were plausible by comparing plots of the distribution of observed and imputed values of all variables. We checked whether the exclusion of patients with no blood pressure measurements (within two years of the baseline) biased the reported associations with cardiovascular diseases by comparing hazard ratios estimated based on imputed data (Figure S22).



## Estimation of lifetime risks and years of life-lost

We estimated lifetime risks of each cardiovascular disease adjusted for the competing risk of other cardiovascular diseases and non-CVD mortality based on Cox models with age as the timescale. For a given disease  $q$  this involves a) estimating separate Cox models for events of disease  $q$  and for the competing events  $1, \dots, q-1, q+1, \dots, Q$  including the same predictor variables, b) multiplying the hazard contribution for disease  $q$  at a given age by the probability of being still at risk and not having experienced a competing event by that age, and c) computing the cumulative incidence (sum of hazards) between the baseline age (age at entry to study) and age 95 ('lifetime').

Thus, for individual  $i$  the lifetime risk of experiencing disease  $q$  from baseline age  $t_i$  to attained age  $t_i+T$  in the presence of the competing risks is given by:

$$r_i(T) = \int_{t_i}^{t_i+T} h_{0q}(t) e^{\beta_q x_i} \exp \left[ - \int_{t_i}^{t_i+t} \sum_{k=1}^Q h_{0k}(t) e^{\beta_k x_i} du \right] dt \quad [1]$$

where  $h_{0q}(t)$  is the baseline hazard for disease  $q$  at age  $t$

$\beta_q$  is a vector of coefficients for cause  $q$

$x_i$  is the vector of covariates for individual  $i$

$h_{0k}(t) e^{\beta_k x_i}$  is the hazard for disease  $k$  for individual  $i$  at age  $t$  given covariates  $x_i$

Expression [1] is estimated by replacing coefficients and baseline hazards by their estimates. Because the baseline hazard is estimated as a step function, the integrals are replaced by sums over event times.

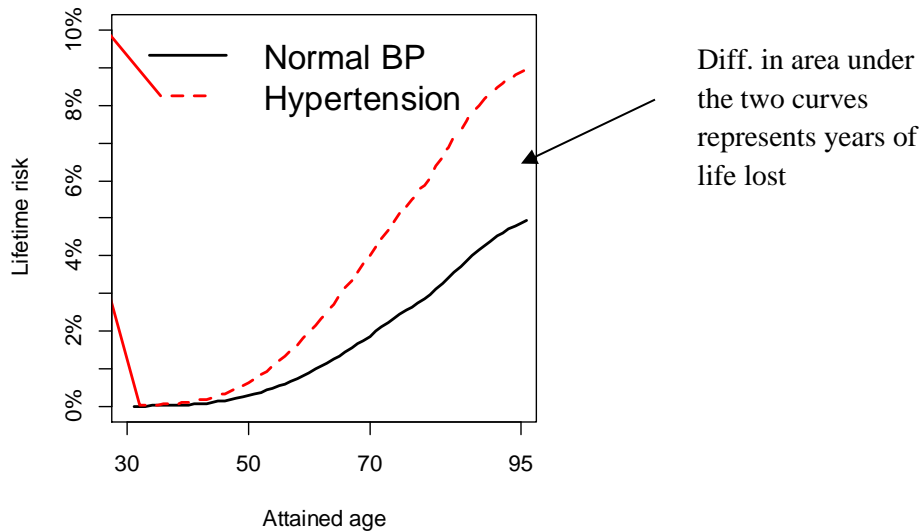

Suppose the two curves in Figure S1 represent the lifetime risk of a 30-year old individual with normal BP (black line) or hypertension (red dashed line) at the baseline measurement. The years of life lost (YLL) are estimated from the difference in the area under the two curves, i.e.:

$$YLL = \int_{30}^{95} \{r_N(u) - r_H(u)\} du \quad [2]$$

where  $r_N(u)$  and  $r_H(u)$  represent risk estimates up to age  $u$  (estimated by expression [1] and adjusted for other risk factors (baseline age, sex, diabetes, smoking status, total cholesterol, HDL cholesterol) assuming normal blood pressure or hypertension respectively, averaged over individuals in the data. We estimated [2] by applying the trapezium rule in intervals of  $u=0.5$  years, from the baseline age to age 95.

## Reference List

- 1 Rubin DB. *Multiple Imputation for Nonresponse in Surveys*. New York 1987.
- 2 White IR, Royston P. Imputing missing covariate values for the Cox model. *Stat Med* 2009;28:1982-1998.
- 3 Higgins JP, Thompson SG, Spiegelhalter DJ. A re-evaluation of random-effects meta-analysis. *J R Stat Soc Ser A Stat Soc* 2009;172:137-159.
